# Supplementary material for: A combination of anatomical and functional evaluations improves the prediction of cardiac event in patients with coronary artery bypass
Source: PubMed Central journal article supplement — BMJ Open. 2013 Nov 9;3(11):e003474. doi: 10.1136/bmjopen-2013-003474 (PMC3831107; doi:10.1136/bmjopen-2013-003474), 2013-11-09
Supplement: bmjopen-2013-003474.draft_revisions.pdf [file bmjopen-2013-003474.draft_revisions.pdf]

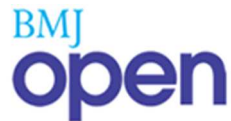

**Combination of Anatomical and Functional Evaluations  
Improves the Prediction of Cardiac Event in Coronary Artery  
Bypass Patients**

|                                 |                                                                                                                                                                                                                                                                                                                                                                                                                                                                                                                                                                                                                                                                                                                                                                                                                                                         |
|---------------------------------|---------------------------------------------------------------------------------------------------------------------------------------------------------------------------------------------------------------------------------------------------------------------------------------------------------------------------------------------------------------------------------------------------------------------------------------------------------------------------------------------------------------------------------------------------------------------------------------------------------------------------------------------------------------------------------------------------------------------------------------------------------------------------------------------------------------------------------------------------------|
| Journal:                        | <i>BMJ Open</i>                                                                                                                                                                                                                                                                                                                                                                                                                                                                                                                                                                                                                                                                                                                                                                                                                                         |
| Manuscript ID:                  | bmjopen-2013-003474                                                                                                                                                                                                                                                                                                                                                                                                                                                                                                                                                                                                                                                                                                                                                                                                                                     |
| Article Type:                   | Research                                                                                                                                                                                                                                                                                                                                                                                                                                                                                                                                                                                                                                                                                                                                                                                                                                                |
| Date Submitted by the Author:   | 25-Jun-2013                                                                                                                                                                                                                                                                                                                                                                                                                                                                                                                                                                                                                                                                                                                                                                                                                                             |
| Complete List of Authors:       | Kawai, Hideki; Fujita Health University, Cardiology<br>Sarai, Masayoshi; Fujita Health University, Cardiology<br>Motoyama, Sadako; Fujita Health University, Cardiology<br>Ito, Hajime; Fujita Health University, Cardiology<br>Takada, Kayoko; Fujita Health University, Cardiology<br>Harigaya, Hiroto; Fujita Health University, Cardiology<br>Takahashi, Hiroshi; Fujita Health University, Medical Statistics<br>Hashimoto, Shuji; Fujita Health University, Hygiene<br>Takagi, Yasushi; Fujita Health University, Cardiovascular Surgery<br>Ando, Motomi; Fujita Health University, Cardiovascular Surgery<br>Anno, Hirofumi; Fujita Health University, Radiological Technology<br>Ishii, Junichi; Fujita Health University, Cardiology<br>Murohara, Toyoaki; Nagoya university, Cardiology<br>Ozaki, Yukio; Fujita Health University, Cardiology |
| <b>Primary Subject Heading</b>: | Cardiovascular medicine                                                                                                                                                                                                                                                                                                                                                                                                                                                                                                                                                                                                                                                                                                                                                                                                                                 |
| Secondary Subject Heading:      | Cardiovascular medicine                                                                                                                                                                                                                                                                                                                                                                                                                                                                                                                                                                                                                                                                                                                                                                                                                                 |
| Keywords:                       | Coronary heart disease < CARDIOLOGY, Ischaemic heart disease < CARDIOLOGY, Myocardial infarction < CARDIOLOGY                                                                                                                                                                                                                                                                                                                                                                                                                                                                                                                                                                                                                                                                                                                                           |
|                                 |                                                                                                                                                                                                                                                                                                                                                                                                                                                                                                                                                                                                                                                                                                                                                                                                                                                         |

SCHOLARONE™  
Manuscripts

1  
2  
3  
4 Combination of Anatomical and Functional Evaluations Improves the Prediction of Cardiac Event in  
5  
6  
7 Coronary Artery Bypass Patients  
8  
9  
10

11  
12 Hideki Kawai, MD\*, Masayoshi Sarai, MD, PhD\*, Sadako Motoyama, MD, PhD\*, Hajime Ito, MD\*,  
13  
14 Kayoko Takada, MD\*, Hiroto Harigaya MD, PhD\*, Hiroshi Takahashi, BSc<sup>&</sup>, Shuji Hashimoto, MD,  
15  
16 PhD<sup>§</sup>, Yasushi Takagi, MD, PhD<sup>§</sup>, Motomi Ando, MD, PhD<sup>§</sup>, Hirofumi Anno, MD, PhD<sup>†</sup>, Junichi  
17  
18 Ishii, MD, PhD\*, Toyoaki Murohara, MD, PhD<sup>‡</sup>, Yukio Ozaki, MD, PhD\*  
19  
20  
21  
22  
23  
24  
25  
26

27 Departments of \*Cardiology, &Medical Statistics, §Hygiene, \$Cardiovascular Surgery and  
28  
29 †Radiology, Fujita Health University, Toyoake, Japan; ‡Department of Cardiology, Nagoya  
30  
31 University Graduate School of Medicine  
32  
33  
34  
35  
36  
37  
38

39 Corresponding Author: Dr. Hideki Kawai, 1-98 Dengakugakubo, Kutsukake-cho, Toyoake, Aichi  
40  
41  
42 470-1192, Japan. E-mail: [hkawai@fujita-hu.ac.jp](mailto:hkawai@fujita-hu.ac.jp) Tel: +81-562-93-9298 Fax: +81-562-93-2315  
43  
44  
45  
46  
47

48 Key words: coronary-artery-bypass grafting, coronary computed tomography angiography,  
49  
50 myocardial perfusion imaging  
51  
52  
53  
54  
55

56 Word Count: 2547  
57  
58  
59  
60

1  
2  
3  
4 Article type: original article  
5  
6  
7  
8

9  
10 Title: Combination of Anatomical and Functional Evaluations Improves the Prediction of Cardiac  
11  
12 Event in Coronary Artery Bypass Patients  
13  
14

15  
16  
17  
18 Author names:  
19

20  
21 Hideki Kawai, MD\*, Masayoshi Sarai, MD, PhD\*, Sadako Motoyama, MD, PhD\*, Hajime Ito, MD\*,  
22  
23 Kayoko Takada, MD\*, Hiroto Harigaya MD, PhD\*, Hiroshi Takahashi, BSc<sup>&</sup>, Shuji Hashimoto, MD,  
24  
25 PhD<sup>§</sup>, Yasushi Takagi, MD, PhD<sup>§</sup>, Motomi Ando, MD, PhD<sup>§</sup>, Hirofumi Anno, MD, PhD<sup>†</sup>, Junichi  
26  
27 Ishii, MD, PhD\*, Toyoaki Murohara, MD, PhD<sup>‡</sup>, Yukio Ozaki, MD, PhD\*  
28  
29  
30  
31  
32

33  
34  
35  
36 Departments of \*Cardiology, &Medical Statistics, §Hygiene, \$Cardiovascular Surgery and  
37  
38 †Radiology, Fujita Health University, Toyoake, Japan; ‡Department of Cardiology, Nagoya  
39  
40 University Graduate School of Medicine  
41  
42  
43  
44  
45  
46  
47

48 Corresponding Author: Dr. Hideki Kawai, 1-98 Dengakugakubo, Kutsukake-cho, Toyoake, Aichi  
49  
50 470-1192, Japan. E-mail: [hkawai@fujita-hu.ac.jp](mailto:hkawai@fujita-hu.ac.jp) Tel: +81-562-93-9298 Fax: +81-562-93-2315  
51  
52  
53  
54

55  
56  
57 Key words: coronary-artery-bypass grafting, coronary computed tomography angiography,  
58  
59  
60

1  
2  
3  
4 myocardial perfusion imaging  
5  
6

7 Study approval: The study was approved by the Institutional Review Board and the ethics committee  
8  
9  
10 of Fujita Health University.  
11

12 Patient consent: We got all patients' consent.  
13

14 Funding statement : no  
15

16 Competing interests: no  
17  
18

19 Contributor statement: Hideki Kawai and Masayoshi Sarai evaluated myocardial perfusion imaging  
20  
21 (MPI). Sadako Motoyama and Hajime Ito evaluated CT imaging. Kayoko Takada and Junichi Ishii  
22  
23 did MPI exam. Hiroto Harigaya and Hirofumi Anno did CT exam. Hiroshi Takahashi and Shuji  
24  
25 Hashimoto gave me some advices about statistics. Yasushi Takagi and Motomi Ando are CABG  
26  
27 operators and attending doctors for most patients. Toyoaki Murohara, and Yukio Ozaki conducted  
28  
29 this study.  
30  
31  
32  
33  
34  
35  
36  
37  
38

39 Trial Registration number (for clinical trials): no  
40  
41  
42  
43  
44  
45  
46  
47  
48  
49  
50  
51  
52  
53  
54  
55  
56  
57  
58  
59  
60

1  
2  
3  
4 Abstract

5  
6  
7 Objective: To study the usefulness of combined risk stratification of coronary computed tomography  
8  
9  
10 angiography (CTA) and myocardial perfusion imaging (MPI) in patients with previous  
11  
12  
13 coronary-artery-bypass grafting (CABG).

14  
15  
16 Design: retrospective, observational, single center

17  
18  
19 Setting and Patients: 204 patients (84.3% male, mean age  $68.7 \pm 7.6$ ) undergoing CTA and MPI.

20  
21  
22 Main outcome measures: CTA defined the number of unprotected coronary territories (UCT) (0, 1, 2,  
23  
24 or 3) by evaluating grafts, distal runoffs, and nongrafted vessels. Using the cut-off value with  
25  
26  
27 receiver-operating characteristics analysis, all patients were divided into 4 groups: Group A (UCT =  
28  
29  
30 0, summed stress score [SSS] < 4), Group B (UCT  $\geq 1$ , SSS < 4), Group C (UCT = 0, SSS  $\geq 4$ ), and  
31  
32  
33 Group D (UCT  $\geq 1$ , SSS  $\geq 4$ ).

34  
35  
36 Results: Cardiac events, as a composite endpoint including cardiac death, nonfatal myocardial  
37  
38  
39 infarction, unstable angina requiring revascularization, and heart-failure hospitalization were  
40  
41  
42 observed in 27 patients for a median follow-up of 27.5 months. The annual event rates were 1.1%,  
43  
44  
45 2.0%, 5.7%, and 12.9% of patients in Group A, B, C, and D, respectively (Log Rank P-value <  
46  
47  
48 0.0001). Adding UCT or SSS to a model with significant clinical factors including left ventricular  
49  
50  
51 ejection fraction, time since CABG, and Euro SCORE II improved the prediction of events, while  
52  
53  
54 adding both UCT and SSS to the model improved it greatly with increasing C-index, net  
55  
56  
57 reclassification improvement and integrated discrimination improvement.

1  
2  
3  
4 Conclusions: The combination of anatomical and functional evaluations non-invasively enhances the  
5  
6  
7 predictive accuracy of cardiac events in CABG patients.  
8  
9

10  
11  
12 Article summary  
13

14  
15 1) Article Focus  
16

- 17  
18 ● To study the prognosis and predictors of previous coronary-artery-bypass grafting (CABG)  
19  
20 patients.  
21  
22  
23  
24 ● Both coronary computed tomography angiography (CTA) and myocardial perfusion imaging  
25  
26 (MPI) are useful for the risk stratification with previous CABG patients.  
27  
28  
29  
30 ● It is usefulness to combine risk stratification of coronary computed tomography angiography  
31  
32 (CTA) and myocardial perfusion imaging (MPI) in patients with previous CABG.  
33  
34  
35  
36  
37  
38

39 2) Key Messages  
40  
41

- 42 ● UCT defined by CTA, SSS by MPI, Left ventricular ejection fraction, time since CABG, and  
43  
44 Euro SCORE II were independent predictors.  
45  
46  
47  
48 ● Each CTA and MPI reflected the prognosis of CABG patients.  
49  
50  
51 ● The combination of anatomical (CTA) and functional (MPI) evaluations non-invasively enhances  
52  
53 the predictive accuracy of cardiac events in CABG patients. The advantages of each imaging  
54  
55 examination complement the limitations of the other.  
56  
57  
58

1  
2  
3  
4  
5  
6  
7  
8  
9  
10 3) Strengths and Limitations  
11

- 12 ● A limited number of patients in a single center were enrolled and were observed retrospectively.
- 13 ● In a large number and prospective study, the usefulness and cost-effectiveness of combined  
14  
15  
16  
17  
18  
19  
20  
21  
22  
23  
24  
25  
26  
27  
28  
29  
30  
31  
32  
33  
34  
35  
36  
37  
38  
39  
40  
41  
42  
43  
44  
45  
46  
47  
48  
49  
50  
51  
52  
53  
54  
55  
56  
57  
58  
59  
60  
evaluation will be studied further.
- We did not perform invasive coronary angiography in all studied patients. (The diagnosis of unprotected coronary territory based on CTA may contain some false-positives and/or false-negatives.)

【Introduction】

Coronary computed tomography angiography (CTA) is a useful tool not only for the detection of obstructive coronary artery disease<sup>1-3</sup>, but also for the risk stratification of patients with coronary artery disease<sup>4-5</sup>. Some studies using CTA have shown good diagnostic performance for the

1  
2  
3  
4 detection of significant stenosis in grafts, with accuracy improved by the newer generation of CT  
5  
6  
7 scanners<sup>6-9</sup>. Recently, Chow et al. and Small et al. demonstrated that CTA was of prognostic value in  
8  
9  
10 patients with previous coronary-artery-bypass grafting (CABG)<sup>10-11</sup>. On the other hand, CTA has  
11  
12  
13 some limitations in the evaluation of distal runoffs, metal clip artifacts, and native coronary segments  
14  
15  
16 of nongrafted vessels, particularly due to the high prevalence of severe calcification in previous  
17  
18  
19 CABG patients<sup>6,8</sup>.

20  
21 Myocardial perfusion imaging (MPI) has been also useful for the risk stratification of patients with  
22  
23  
24 previous CABG<sup>12-14</sup>. MPI is regarded as the gold standard for the risk stratification of such patients  
25  
26  
27<sup>15</sup>, despite some limitations. Patients after CABG have a high prevalence of perfusion defects  
28  
29  
30 because of old myocardial infarction or ischemic areas resulting from coronary side branch occlusion,  
31  
32  
33 and so there is a low positive predictive value for prognostic evaluation.  
34  
35

36  
37 In previous studies, Schuijf et al. showed that MPI and CTA provided different and complementary  
38  
39  
40 information on patients with suspected CAD<sup>16</sup>. Werkhoven et al. concluded that combined  
41  
42  
43 anatomical and functional assessment might allow improved risk stratification<sup>17</sup>. The purpose of the  
44  
45  
46 present study was to assess the prognosis of CABG patients by CTA and MPI, and to determine the  
47  
48  
49 efficacy of such combined anatomical and functional assessment.  
50  
51  
52  
53  
54  
55

## 56 57 **【Methods】**



1  
2  
3  
4 We studied 211 patients with a history of CABG. From January 2006 to October 2011, they  
5  
6  
7 underwent both CTA and MPI within 3 months of each other, and their clinical endpoints were  
8  
9  
10 followed. Exclusion criteria were: 1) complicating congenital heart disease; 2) after valve surgery or  
11  
12  
13 left ventricular (LV) aneurysm resection; 3) known allergy to iodinated contrast agents; 4) severe  
14  
15  
16 renal insufficiency not requiring hemodialysis (estimated glomerular filtration rate [eGFR] <30  
17  
18  
19 mL/min/1.73m<sup>2</sup>). To determine the preoperative risk assessment of these patients, we used a logistic  
20  
21  
22 European System for Cardiac Operative Risk Evaluation risk model (EuroSCORE II)<sup>18</sup>. The study  
23  
24  
25 was approved by the Institutional Review Board and the ethics committee of Fujita Health  
26  
27  
28 University.

### 33 Coronary Computed Tomography Angiography

34  
35  
36 In the first 27 patients, 64-slice CT (Aquilion 64, Toshiba Medical Systems, Otawara, Japan) was  
37  
38  
39 used with a collimation of 64 × 0.5mm, rotation speed of 350, 375, 400msec, and retrospective  
40  
41  
42 triggering electrocardiogram (ECG). For the contrast enhanced scan, a total amount of 80 to 90 mL  
43  
44  
45 of contrast medium with an injection flow rate of 4 mL/second was injected, followed by a 40-mL  
46  
47  
48 saline bolus chase. Volumetric data were reconstructed with segmented reconstruction<sup>9</sup>. In the  
49  
50  
51 remaining 184 patients, 320-slice CT (Aquilion One Toshiba Medical Systems, Otawara, Japan) was  
52  
53  
54 used with a collimation of 320 × 0.5mm, rotation speed of 350, 375, 400msec, and prospective  
55  
56  
57 triggering ECG. A bolus of 1.1 mL/kg contrast medium was injected over 18 s, followed by a 20-mL  
58  
59  
60

1  
2  
3  
4 saline bolus chase. Volumetric data were reconstructed with half or segmented reconstruction<sup>19</sup>. All  
5  
6  
7 scans were performed during a single breath-hold. Isosorbide dinitrate spray was provided  
8  
9  
10 immediately before CTA. The effective radiation dose was  $12.7 \pm 9.1$  mSv ( $9.8 \pm 3.7$  mSv in  
11  
12  
13 320-slice CT and  $32.6 \pm 10.4$  mSv in 64-slice CT). After acquisition of the reconstructed volumetric  
14  
15  
16 data, images were transferred to a workstation (ZIOSTATION System 1000, Amin/ZIO, Tokyo,  
17  
18  
19 Japan). On CT images, coronary arteries were divided into 15 segments based on the  
20  
21  
22 recommendations of the American Heart Association<sup>20</sup>. All native coronary arteries and bypass  
23  
24  
25 grafts were evaluated by two experienced observers (SM and HI) unaware of the clinical history and  
26  
27  
28 MPI findings of the patients. Atherosclerotic lesions and stenoses were classified visually as mild (<  
29  
30  
31 50% luminal diameter), moderate (50% to 69%), or severe ( $\geq 70\%$ ). Significant stenoses were  
32  
33  
34 defined as left main trunk  $\geq 50\%$  diameter stenosis, other native vessel stenosis  $\geq 70\%$ , or graft  
35  
36  
37 stenosis  $\geq 70\%$ . Native coronary segments (including stented segments) and grafts, that were not  
38  
39  
40 assessable because of severe calcification and motion artifacts, were regarded as severe stenoses.  
41  
42  
43 Patients were categorized according to the number (0, 1, 2, or 3) of unprotected coronary territories  
44  
45  
46 (UCT)<sup>10</sup>.  
47  
48  
49  
50

51 Stress-rest myocardial perfusion imaging:

52  
53  
54 In all patients, stress-rest MPI using thallium (Tl)-201 was performed with adenosine stress<sup>21</sup>. Data  
55  
56  
57 were acquired with a dual headed SPECT gamma camera (ADAC, VERTEX-plus EPIC, USA)  
58  
59  
60

1  
2  
3  
4 followed by reconstruction into long- and short-axis projections perpendicular to the heart axis; data  
5  
6  
7 were presented in polar map format and a 17-segment model was used in which myocardial  
8  
9  
10 segments were allocated to the territories of the different coronary arteries <sup>22</sup>. Tl-201 uptake was  
11  
12  
13 graded subjectively in three orthogonal planes (short axis, horizontal long axis, vertical long axis)  
14  
15  
16 divided into 17 segments on a five-point scale (4 = absent uptake; 3 = severely, 2 = moderately, 1 =  
17  
18  
19 mildly decreased uptake; 0 = normal uptake, respectively) on the post stress and delayed images  
20  
21  
22 displayed side by side by the consensus of two experienced observers (MS and HK) unaware of the  
23  
24  
25 clinical history and CTA findings of the patients <sup>19</sup>. The segmental perfusion scores during stress and  
26  
27  
28 rest were added together to calculate the summed stress score (SSS).

#### 33 Patient follow-up:

34  
35  
36 Patient follow-up data were gathered by observers blinded to the baseline CTA and MPI results  
37  
38  
39 using clinical visits or standardized telephone interviews. Cardiac events (cardiac death, nonfatal  
40  
41  
42 myocardial infarction, unstable angina requiring revascularization, and admission to a hospital due to  
43  
44  
45 heart failure) were regarded as clinical end points. Deaths were considered cardiac when the primary  
46  
47  
48 cause of death was related to myocardial ischemia/infarction, heart failure or arrhythmia, and when a  
49  
50  
51 noncardiac cause of death could not be identified. Nonfatal myocardial infarction was defined as  
52  
53  
54 myocardial ischemia resulting in abnormal cardiac biomarkers (>99<sup>th</sup> percentile of the upper normal  
55  
56  
57 limits). Unstable angina was defined as acute chest pain with or without the presence of ECG  
58  
59  
60

1  
2  
3  
4 abnormalities, and negative cardiac enzyme levels <sup>23-24</sup>. Patients undergoing elective  
5  
6 revascularization within 3 months after CTA or MPI (early elective revascularization) were excluded  
7  
8  
9 after enrollment.  
10

#### 11 12 13 14 15 16 Statistical analysis:

17  
18 All data were presented as the mean  $\pm$  SD for continuous variables and frequency (percentage) for  
19  
20 categorical variables. The mean values for the two groups were compared with chi-square tests for  
21  
22 categorical and Wilcoxon sum rank test for continuous variables. All analyses were performed with  
23  
24 JMP Version 10, (SAS Institute Inc., Cary, NC, USA) and a p-value of  $< 0.05$  was considered as  
25  
26 statistically significant.  
27  
28  
29  
30  
31  
32

33 The prognosis of CABG patients was assessed in univariate and multivariate models based on UCT,  
34  
35 SSS, and their combination. Receiver-operating characteristics (ROC) analysis was performed to  
36  
37 determine cutoff values of UCT and SSS for cardiac events. Risk adjusted analyses were performed  
38  
39 with Cox proportional hazard models to determine the independent prognostic value of UCT, SSS,  
40  
41 and their combination by controlling for other predictors. Cumulative event rates were estimated  
42  
43  
44  
45  
46  
47  
48 with the Kaplan-Meier method and were compared with the log-rank test.  
49

50  
51 The increased discriminative value after addition of UCT and/or SSS to the established clinical  
52  
53 risk factors was estimated using the C-index for ROC curve, net reclassification improvement (NRI),  
54  
55 and integrated discrimination improvement (IDI). The C-index is defined as the area under an ROC  
56  
57  
58  
59  
60

1  
2  
3  
4 curve between individual predicted probabilities and incidence of events, and is compared between  
5  
6  
7 in a baseline model consisting of established clinical risk factors with  $p < 0.05$  by univariate Cox  
8  
9  
10 analysis, and in an enriched model with UCT and/or SSS<sup>25</sup>. The NRI indicates relatively how many  
11  
12  
13 patients show a decrease in their predicted probabilities for events, while the IDI represents the  
14  
15  
16 average decrease in predicted probabilities for events after adding UCT and/or SSS into the baseline  
17  
18  
19 model, respectively<sup>26</sup>.

## 27 **【Results】**

28  
29  
30 Clinical characteristics:

31  
32  
33 In total, 204 patients (84.3% male, mean age  $68.7 \pm 7.6$  years) were enrolled after excluding 7  
34  
35  
36 patients: 4 undergoing early elective revascularization within 3 months after imaging examination,  
37  
38  
39 and 3 lost to follow-up. The mean follow-up period was  $30.3 \pm 17.6$  months (median; 27.5 months). In  
40  
41  
42 Table 1, baseline characteristics are listed in detail. At follow-up, cardiac events were observed in 27  
43  
44  
45 patients (13.2%) with an annualized event rate of 5.2% (3 patients with cardiac death, 9 patients with  
46  
47  
48 non-fatal infarction, 3 patients with unstable angina requiring revascularization, and 12 patients with  
49  
50  
51 heart failure). In the univariate Cox analysis, LVEF determined by cardiac ultrasound [Hazard Ratio  
52  
53  
54 (HR): 0.936; 95% Confidence Interval (CI): 0.905 to 0.968;  $p = 0.0002$ ], time since CABG (HR:  
55  
56  
57 1.01; 95% CI: 1.00-1.02;  $p = 0.0008$ ), and EuroSCORE II (HR: 1.29; 95% CI: 1.02-1.57;  $p = 0.038$ )

1  
2  
3  
4 were significant predictors of cardiac events.  
5  
6  
7  
8

#### 9 10 CTA, MPI Findings and Analysis with the Combination of UCT and SSS 11

12 The UCT and SSS were significant predictors for cardiac events (HR: 2.52; 95% CI: 1.59 to 3.96;  
13  $p=0.0001$  and HR: 1.08; 95% CI: 1.05 to 1.12;  $p < 0.0001$ , respectively). To maximize the predictive  
14 power of UCT and SSS, cut-off levels were determined as 1 for UCT [area under curve (AUC) =  
15 0.71] and 4 for SSS (AUC = 0.76), respectively. Cumulative incidence rates for cardiac events are  
16 demonstrated in Figure 1A and 1B (log rank  $p$ -value = 0.0054 and  $< 0.0001$ , respectively). After  
17 adjustment for LVEF, time since CABG and EuroSCORE II, patients with  $UCT \geq 1$  had 2.34-fold  
18 higher risk of cardiac events (95% CI 1.01 to 5.89,  $p = 0.0465$ ). Similarly, patients with  $SSS \geq 4$  had  
19 3.36-fold higher risk of cardiac events (95% CI 1.18 to 12.12,  $p = 0.0217$ ) (Table 2a).  
20  
21  
22  
23  
24  
25  
26  
27  
28  
29  
30  
31  
32  
33  
34  
35  
36  
37  
38

39 Based on the CTA and MPI findings, we divided all patients into 4 groups: Group A ( $UCT = 0$ ,  $SSS$   
40  $< 4$ ), Group B ( $UCT \geq 1$ ,  $SSS < 4$ ), Group C ( $UCT = 0$ ,  $SSS \geq 4$ ), and Group D ( $UCT \geq 1$ ,  $SSS \geq 4$ ).  
41  
42 The annual event rates of cardiac events were 1.1%, 2.0%, 5.7%, and 12.9% of patients in group A,  
43 B, C and D, respectively. Cardiac event curves are demonstrated in Figure 1C (log rank  $p$ -value  $<$   
44 0.0001). After adjustment for LVEF, time since CABG, and EuroSCORE II, patients with  $UCT \geq 1$   
45 and  $SSS \geq 4$  had 6.84-fold (95% CI 1.83 to 44.50,  $p = 0.0026$ ) higher risk for cardiac events  
46 compared to those with  $UCT = 0$  and  $SSS < 4$  (Table 2b).  
47  
48  
49  
50  
51  
52  
53  
54  
55  
56  
57  
58  
59  
60

1  
2  
3  
4  
5  
6  
7 Discrimination of Each Predicting Models for Cardiac Events (Table 3)  
8

9  
10 Addition of UCT alone, SSS alone, and both UCT and SSS to a baseline model with clinical risk  
11  
12 factors consisting of LVEF, time since CABG, and EuroSCORE II significantly improved both the  
13  
14 NRI and IDI. However, C-index was significantly greater only in the model with both UCT and SSS  
15  
16 compared to the baseline model (0.834 vs. 0.768,  $p=0.045$ ). In addition, the NRI and IDI  
17  
18 significantly increased in the model containing both UCT and SSS even if compared to the model  
19  
20 containing UCT alone or SSS alone.  
21  
22  
23  
24  
25  
26  
27  
28  
29  
30  
31  
32

33 **【Discussion】**  
34

35  
36 We focused on the prognosis of CABG patients assessed by CTA and MPI, and the usefulness of  
37  
38 this combination. The patients without unprotected territories on CTA and without perfusion defects  
39  
40 on MPI have a good prognosis. The prognosis of patients with abnormal CTA (UCT;  $\geq 1$ ) and MPI  
41  
42 (SSS  $\geq 4$ ) is significantly poorer than that of patients with normal CTA and MPI. Each examination  
43  
44 has incremental prognostic value, and the combination of anatomical and functional evaluation  
45  
46  
47  
48  
49 facilitates non-invasive assessment of the prognosis of CABG patients. This improvement was  
50  
51  
52  
53  
54 indicated to be statistically significant by the increase in the NRI and IDI.  
55

56  
57 Several reports have shown the utility of MPI with assessment of the prognosis in CABG patients  
58  
59  
60

1  
2  
3  
4 <sup>12-14</sup>, but there are some limitations.

5  
6  
7 First, many CABG patients have some abnormal findings on MPI, because of a history of prior  
8  
9 myocardial infarctions, and others have ischemic territories with side branch occlusion even if the  
10  
11 major coronary trees are protected. Actually in the present study, 48.5% of the enrolled patients had  
12  
13 an abnormal MPI finding (SSS  $\geq$  4). To identify the patients with a poor prognosis strictly among  
14  
15 those with MPI abnormalities, the evaluation of unprotected coronary territories on CTA was useful.  
16  
17  
18  
19  
20  
21 The event rates were 33.3% in the abnormal CTA patients (Group D), in contrast to 12.5% in the  
22  
23 normal CTA patients (Group C).  
24  
25

26  
27 Importantly, MPI does not clarify the anatomy of grafts or native coronary arteries, even when high  
28  
29 risk patients are identified. On the other hand, CTA provides information on grafts and unprotected  
30  
31 native coronary arteries non-invasively, and in this way contributes to devising the most appropriate  
32  
33 therapeutic strategy.  
34  
35

36  
37  
38  
39 Several studies have also demonstrated the diagnostic accuracy of CTA in CABG patients <sup>6-9</sup>, and  
40  
41 two recent studies reported the prognostic value of CTA in CABG patients <sup>10-11</sup>. They concluded that  
42  
43 assessment with CTA is of prognostic value in CABG patients, despite some limitations.  
44  
45

46  
47  
48 First, some difficulties remain regarding the diagnostic accuracy <sup>7-9</sup>. Indeed the diagnostic accuracy  
49  
50 of graft segments is good, but CABG patients have a high prevalence of severe calcifications and  
51  
52 stented segments in the native coronary arteries, leading to some overestimation of stenosis of the  
53  
54 distal runoff segments of the protected coronary arteries, and unprotected native coronary arteries  
55  
56  
57  
58



1  
2  
3  
4 including stented segments. Actually in our study, unassessable native coronary or graft segments  
5  
6  
7 were regarded as severe stenosis, likely resulting in some overestimation of the number of  
8  
9  
10 unprotected coronary territories. In other words, some CTA findings in Group B patients (abnormal  
11  
12  
13 CTA and normal MPI) may be false positives. In a prior study, Chow et al. excluded cases with > 5  
14  
15  
16 unassessable segments. Actually, it is of use to add MPI in the assessment of patients with poor CTA  
17  
18  
19 images <sup>10</sup>.

20  
21  
22 Second, patients with normal CTA may experience any kind of cardiac event. Some patients with  
23  
24  
25 major branches protected have an ischemic or infarcted area due to prior myocardial infarction or  
26  
27  
28 side branch occlusion, and so the at risk area might cause fatal arrhythmia and heart failure in them  
29  
30  
31 even if the risk of ungrafted coronary events or graft failure is very low. The present study  
32  
33  
34 demonstrates that the prognosis of patients with normal CTA and abnormal MPI (Group C) is poorer  
35  
36  
37 (event-free rate; 87.5%) than that of those with normal CTA and MPI (Group A: 97.3).

38  
39 Finally, prior CTA studies lacked some necessary data <sup>10-11</sup>. Small et al. and Chow et al. did not  
40  
41  
42 obtain data of the time since CABG <sup>10-11</sup> or the variety of graft types <sup>10</sup>. In prior prognostic studies of  
43  
44  
45 MPI or CAG, time since CABG and the variety of grafts were identified as important predictors <sup>12-14</sup>.  
46  
47  
48 When the prognosis of CABG patients is discussed, information on the time since CABG and the  
49  
50  
51 variety of grafts is indispensable.

52  
53  
54  
55  
56  
57 Limitations:  
58  
59  
60

1  
2  
3  
4 This study has some limitations. First, a limited number of patients in a single center were enrolled  
5  
6  
7 and were observed retrospectively. Second, we did not perform invasive coronary angiography in all  
8  
9  
10 studied patients. The diagnosis of unprotected coronary territory based on CTA may contain some  
11  
12  
13 false-positives and/or false-negatives.  
14

#### 21 **【Conclusions】**

22  
23  
24 Our results indicate that the combination of MPI and CTA is useful for the risk stratification of  
25  
26  
27 patients with previous CABG. The advantages of each imaging examination complement the  
28  
29  
30 limitations of the other. The combination of anatomical and functional evaluations enhances  
31  
32  
33 assessment of the prognosis of CABG patients non-invasively.  
34  
35  
36  
37  
38  
39  
40  
41

#### 42 **【Acknowledgements】**

43  
44  
45 We have received no financial support, and have no financial relationship with industry.  
46  
47

48 There is no additional data available.  
49  
50  
51  
52

#### 53 **【Authors' contribution】**

54  
55  
56 Hideki Kawai and Masayoshi Sarai evaluated myocardial perfusion imaging (MPI). Sadako  
57  
58  
59  
60

1  
2  
3  
4 Motoyama and Hajime Ito evaluated CT imaging. Kayoko Takada and Junichi Ishii did MPI exam.  
5  
6

7 Hiroto Harigaya and Hirofumi Anno did CT exam. Hiroshi Takahashi and Shuji Hashimoto gave me  
8

9 some advices about statistics. Yasushi Takagi and Motomi Ando are CABG operators and attending  
10

11 doctors for most patients. Toyoaki Murohara, and Yukio Ozaki conducted this study.  
12  
13  
14  
15  
16  
17  
18  
19  
20  
21  
22  
23  
24  
25  
26  
27  
28  
29  
30  
31  
32  
33  
34  
35  
36  
37  
38  
39  
40  
41  
42  
43  
44  
45  
46  
47  
48  
49  
50  
51  
52  
53  
54  
55  
56  
57  
58  
59  
60

For peer review only

- 1  
2  
3  
4 1. Miller JM, Rochitte CE, Dewey M, et al. Diagnostic performance of coronary angiography by  
5  
6  
7 64-row CT. *N Engl J Med*. 2008; 359 (22): 2324-36  
8  
9
- 10 2. de Graaf FR, Schuijf JD, van Velzen JE, et al. Diagnostic accuracy of 320-row multidetector  
11  
12 computed tomography coronary angiography in the non-invasive evaluation of significant  
13  
14 coronary artery disease. *Eur Heart J*. 2010;31(15):1908-15.  
15  
16
- 17 3. Motoyama S, Anno H, Sarai M, et al. Noninvasive coronary angiography with a prototype  
18  
19 256-row area detector computed tomography system: comparison with conventional invasive  
20  
21 coronary angiography. *J Am Coll Cardiol*. 2008; 51(7): 773-5  
22  
23  
24  
25  
26
- 27 4. Hulten EA, Carbonaro S, Petrillo SP, et al. Prognostic value of cardiac computed tomography  
28  
29 angiography: a systematic review and meta-analysis. *J Am Coll Cardiol*. 2011; 57(10): 1237-47  
30  
31  
32
- 33 5. Min JK, Shaw LJ, Devereux RB, et al. Prognostic value of multidetector coronary computed  
34  
35 tomographic angiography for prediction of all-cause mortality. *J Am Coll Cardiol*. 2007; 50(12):  
36  
37  
38 1161-70  
39  
40  
41
- 42 6. Malagutti P, Nieman K, Meijboom WB, et al. Use of 64-slice CT in symptomatic patients after  
43  
44 coronary bypass surgery: evaluation of grafts and coronary arteries. *Eur Heart J*. 2007;  
45  
46  
47 28(15):1879-85.  
48  
49
- 50 7. de Graaf FR, van Velzen JE, Witkowska AJ, et al. Diagnostic performance of 320-slice  
51  
52 multidetector computed tomography coronary angiography in patients after coronary artery  
53  
54 bypass grafting. *Eur Radiol*. 2011 Nov; 21(11):2285-96.  
55  
56  
57  
58  
59  
60

- 1  
2  
3  
4 8. Weustink AC, Nieman K, Pugliese F, et al. Diagnostic accuracy of computed tomography  
5  
6  
7 angiography in patients after bypass grafting: comparison with invasive coronary angiography.  
8  
9  
10 JACC Cardiovasc Imaging. 2009; 2 (7): 816-24.  
11
- 12  
13 9. Tochii M, Takagi Y, Anno H, et al. Accuracy of 64-slice multidetector computed tomography for  
14  
15 diseased coronary artery graft detection. Ann Thorac Surg 2010; 89: 1906-11  
16  
17
- 18  
19 10. Chow BJ, Ahmed O, Small G, et al. Prognostic value of CT angiography in coronary bypass  
20  
21 patients. JACC Cardiovasc Imaging. 2011; 4(5): 496-502.  
22  
23
- 24  
25 11. Small GR, Yam Y, Chen L, et al. Prognostic assessment of coronary artery bypass patients with  
26  
27 64-slice computed tomography angiography: anatomical information is incremental to clinical  
28  
29 risk prediction. J Am Coll Cardiol. 2011; 58(23): 2389-95.  
30  
31  
32
- 33  
34 12. Miller TD, Christian TF, Hodge DO, et al. Prognostic value of exercise thallium-201 imaging  
35  
36 performed within 2 years of coronary artery bypass graft surgery. J Am Coll Cardiol. 1998;  
37  
38 31(4):848-54.  
39  
40  
41
- 42  
43 13. Palmas W, Bingham S, Diamond GA, et al. Incremental prognostic value of exercise  
44  
45 thallium-201 myocardial single-photon emission computed tomography late after coronary  
46  
47 artery bypass surgery. J Am Coll Cardiol. 1995; 25(2):403-9.  
48  
49  
50
- 51  
52 14. Lauer MS, Lytle B, Pashkow F, et al. Prediction of death and myocardial infarction by screening  
53  
54 with exercise-thallium testing after coronary-artery-bypass grafting. Lancet. 1998;  
55  
56 351(9103):615-22.  
57  
58  
59  
60

- 1  
2  
3  
4 15. Klocke FJ, Baird MG, Lorell BH, et al. ACC/AHA/ASNC guidelines for the clinical use of  
5  
6 cardiac radionuclide imaging--executive summary: a report of the American College of  
7  
8 Cardiology/American Heart Association Task Force on Practice Guidelines (ACC/AHA/ASNC  
9  
10 Committee to Revise the 1995 Guidelines for the Clinical Use of Cardiac Radionuclide Imaging).  
11  
12 American College of Cardiology; American Heart Association Task Force on Practice  
13  
14 Guidelines; American Society for Nuclear Cardiology. *Circulation*. 2003; 108(11):1404-18.  
15  
16  
17  
18  
19  
20  
21 16. Schuijf JD, Wijns W, Jukema JW, et al. Relationship between noninvasive coronary angiography  
22  
23 with multi-slice computed tomography and myocardial perfusion imaging. *J Am Coll Cardiol*.  
24  
25 2006; 48(12):2508-14.  
26  
27  
28  
29  
30 17. van Werkhoven JM, Schuijf JD, Gaemperli O, et al. Prognostic value of multislice computed  
31  
32 tomography and gated single-photon emission computed tomography in patients with suspected  
33  
34 coronary artery disease. *J Am Coll Cardiol*. 2009; 53(7):623-32.  
35  
36  
37  
38  
39 18. Nashef SA, Roques F, Sharples LD, et al. EuroSCORE II. *Eur J Cardiothorac Surg*. 2012; 41(4):  
40  
41 734-44  
42  
43  
44  
45 19. Takagi Y, Akita K, Kondo H, et al. Non-invasive Evaluation of Internal Thoracic Artery  
46  
47 Anastomosed to the Left Anterior Descending Artery with 320-Detector Row Computed  
48  
49 Tomography and Adenosine Thallium-201 Myocardial Perfusion Scintigraphy. *Ann Thorac*  
50  
51 *Cardiovasc Surg*. 2012; 18(1):24-30.  
52  
53  
54  
55  
56  
57  
58  
59  
60

- 1  
2  
3  
4 20. A reporting system on patients evaluated for coronary artery disease. Report of the Ad Hoc  
5  
6  
7 Committee for Grading of Coronary Artery Disease, Council on Cardiovascular Surgery,  
8  
9  
10 American Heart Association. *Circulation* 1975; 51: 5-40  
11  
12  
13 21. Nishimura S, Mahmorian JJ, Boyce TM, et al. Quantitative thallium-201 single-photon emission  
14  
15  
16 computed tomography during maximal pharmacologic coronary vasodilation with adenosine for  
17  
18  
19 assessing coronary artery disease. *J Am Coll Cardiol*. 1991 (3):736-45.  
20  
21  
22 22. Cerqueira MD, Weissman NJ, Dilsizian V, et al. Standardized myocardial segmentation and  
23  
24  
25 nomenclature for tomographic imaging of the heart: a statement for healthcare professionals  
26  
27  
28 from the Cardiac Imaging Committee of the Council on Clinical Cardiology of the American  
29  
30  
31 Heart Association. American Heart Association Writing Group on Myocardial Segmentation and  
32  
33  
34 Registration for Cardiac Imaging. *Circulation*. 2002; 105(4):539-42.  
35  
36  
37 23. Rapezzi C, Biagini E, Branzi A. Guidelines for the diagnosis and treatment of non-ST-segment  
38  
39  
40 elevation acute coronary syndromes: the task force for the diagnosis and treatment of  
41  
42  
43 non-ST-segment elevation acute coronary syndromes of the European Society of Cardiology. *Eur*  
44  
45  
46 *Heart J*. 2008 (2):277-8.  
47  
48  
49 24. O'Connor RE, Brady W, Brooks SC, et al. Part 10: acute coronary syndromes: 2010 American  
50  
51  
52 Heart Association Guidelines for Cardiopulmonary Resuscitation and Emergency  
53  
54  
55 Cardiovascular Care. *Circulation*. 2010; 122(18 Suppl 3): S787-817.  
56  
57  
58  
59  
60

1  
2  
3  
4 25. DeLong ER, DeLong DM, Clarke-Pearson DL. Correlated Receiver Operating Characteristic

5  
6  
7 Curves: A Nonparametric Approach. Biometrics 1988; 44: 837-45

8  
9  
10 26. Pencina MJ, D'Agostino RB Sr, D'Agostino RB Jr, et al. Evaluating the added predictive ability

11  
12 of a new marker: from area under the ROC curve to reclassification and beyond. Stat Med. 2008;

13  
14  
15 27(29: 157-72)

16  
17  
18  
19  
20  
21  
22  
23  
24  
25  
26  
27  
28  
29  
30  
31  
32  
33  
34  
35  
36  
37  
38  
39  
40  
41  
42  
43  
44  
45 Figure legends

46  
47  
48  
49  
50  
51 Figure 1. Cardiac event curves according to (A) UCT, (B) SSS, (C) each group

52  
53  
54 UCT: unprotected coronary territory, SSS: summed stress score



Table 1. Patient Characteristics

|                             | All<br>(n=204) | Cardiac Events<br>(n=27) | No Events<br>(n=177) | p Value |
|-----------------------------|----------------|--------------------------|----------------------|---------|
| Age (years)                 | 68.7±7.6       | 70.0±7.7                 | 68.5±7.6             | 0.46    |
| Gender (male)               | 172 (84.3%)    | 21 (77.8%)               | 151 (85.3%)          | 0.527   |
| Diabetes                    | 106 (52.0%)    | 17 (63.0%)               | 89 (50.3%)           | 0.234   |
| Dyslipidemia                | 116 (56.9%)    | 18 (66.7%)               | 98 (55.4%)           | 0.214   |
| Hypertension                | 172 (84.3%)    | 24 (88.9%)               | 148 (83.6%)          | 0.673   |
| Hemodialysis                | 9 (4.4%)       | 2 (7.4%)                 | 7 (4.0%)             | 0.229   |
| Current Smoker              | 39 (19.1%)     | 5 (18.5%)                | 34 (19.2%)           | 0.905   |
| LVEF (%)                    | 52.1±9.9       | 44.9±11.5                | 53.2±9.3             | 0.0002  |
| Time since CABG<br>(months) | 25.3±51.2      | 55.8±66.7                | 20.7±47.0            | 0.0008  |
| OMI                         | 34 (16.7%)     | 8 (29.6%)                | 26 (14.7%)           | 0.08    |
| Post PCI                    | 23 (11.3%)     | 5 (18.5%)                | 18 (10.2%)           | 0.319   |
| Using ITA                   | 191 (93.6%)    | 23 (85.2%)               | 168 (94.9%)          | 0.089   |
| EuroSCORE II                | 1.90±1.32      | 2.43±1.69                | 1.81±1.24            | 0.038   |

LVEF: left ventricular ejection fraction by ultrasonic cardiography, CABG: coronary aorta bypass graft, OMI: old myocardial infarction, PCI: percutaneous coronary intervention, ITA: internal thoracic artery

Table 2a. CTA, MPI Findings: Univariable and Multivariate Analysis for Cardiac Events

|         | Cardiac<br>Events<br>(n=27) | No Events<br>(n=177) | Annual<br>Event<br>Rate, % | Unadjusted<br>Hazards Ratio<br>(95%CI) | P value | Adjusted<br>Hazards Ratio<br>(95%CI) | P value |
|---------|-----------------------------|----------------------|----------------------------|----------------------------------------|---------|--------------------------------------|---------|
| UCT= 0  | 8<br>(6.5%)                 | 115<br>(93.5%)       | 2.82                       | 1                                      |         | 1                                    |         |
| UCT ≥ 1 | 19<br>(23.5%)               | 62<br>(76.5%)        | 8.27                       | 3.07<br>(1.38-7.49)                    | 0.0054  | 2.34#<br>(1.01-5.89)                 | 0.0465  |
| SSS < 4 | 4<br>(3.8%)                 | 101<br>(96.2%)       | 1.44                       | 1                                      |         | 1                                    |         |
| SSS ≥ 4 | 23<br>(23.2%)               | 76<br>(76.8%)        | 9.67                       | 6.73<br>(2.59-22.96)                   | <0.0001 | 3.36&<br>(1.18-12.12)                | 0.0217  |

UCT: unprotected coronary territory, SSS: summed stress score, # Hazards ratio was adjusted for LVEF, time since CABG, EuroSCORE II, and SSS, & Hazards ratio was adjusted for LVEF, time since CABG, EuroSCORE II, and UCT

Table 2b. Combination of UCT and SSS: (Univariable and Multivariate Analysis for Cardiac Events)

| Group | UCT | SSS | No of patients | No of patients with Cardiac Events (%) | Annual Event Rate (%) | Unadjusted hazards ratio (95%CI) | P value | Adjusted hazards ratio\$ (95%CI) | P value |
|-------|-----|-----|----------------|----------------------------------------|-----------------------|----------------------------------|---------|----------------------------------|---------|
| A     | 0   | <4  | 75             | 2(2.7)                                 | 1.1                   | 1                                |         | 1                                |         |
| B     | ≥1  | <4  | 30             | 2(6.7)                                 | 2.0                   | 1.93<br>(0.23-16.16)             | 0.515   | 1.76<br>(0.21-15.11)             | 0.579   |
| C     | 0   | ≥4  | 48             | 6(13.0)                                | 5.7                   | 5.15<br>(1.19-35.17)             | 0.0279  | 2.73<br>(0.55-19.93)             | 0.225   |
| D     | ≥1  | ≥4  | 51             | 17(33.0)                               | 12.9                  | 11.9<br>(3.40-75.19)             | <0.0001 | 6.84<br>(1.83-44.5)              | 0.0026  |

\$ Hazards ratio was adjusted for LVEF, time since CABG, and EuroSCORE II

Table 3. Discrimination of Each Predicting Models for Cardiac Events

| Risk Factors and Imaging Findings       | Discrimination         |           |           |         |           |         |
|-----------------------------------------|------------------------|-----------|-----------|---------|-----------|---------|
|                                         | C Index (95%CI)        | p Value   | NRI       | p Value | IDI       | p Value |
| Clinical risk factors#                  | 0.768<br>(0.655-0.880) | Reference | Reference |         | Reference |         |
| Clinical risk factors# plus UCT         | 0.811<br>(0.718-0.905) | 0.1049    | 0.707     | 0.0003* | 0.0369    | 0.0235  |
| Clinical risk factors# plus SSS         | 0.807<br>(0.701-0.912) | 0.1156    | 0.731     | 0.0002* | 0.0421    | 0.0005  |
| Clinical risk factors# plus UCT and SSS | 0.834<br>(0.742-0.927) | 0.0454*   | 0.649     | 0.0008* | 0.0701    | 0.0006  |
| Clinical risk factors# plus UCT         |                        | Reference | Reference |         | Reference |         |
| Clinical risk factors# plus UCT and SSS |                        | 0.1989    | 0.707     | 0.0003* | 0.0281    | 0.039   |
| Clinical risk factors# plus SSS         |                        | Reference | Reference |         | Reference |         |
| Clinical risk factors# plus UCT and SSS |                        | 0.1486    | 0.645     | 0.0009* | 0.0333    | 0.0009  |

UCT: unprotected coronary territory, SSS: summed stress score, NRI: Net Reclassification Improvement, IDI:

Integrated Discrimination Improvement

#Clinical risk factors comprise LVEF, time since CABG, and EuroSCORE II

1  
2  
3  
4  
5  
6  
7  
8  
9  
10  
11  
12  
13  
14  
15  
16  
17  
18  
19  
20  
21  
22  
23  
24  
25  
26  
27  
28  
29  
30  
31  
32  
33  
34  
35  
36  
37  
38  
39  
40  
41  
42  
43  
44  
45  
46  
47  
48  
49  
50  
51  
52  
53  
54  
55  
56  
57  
58  
59  
60

For peer review only

1  
2  
3  
4  
5  
6  
7  
8  
9  
10  
11  
12  
13  
14  
15  
16  
17  
18  
19  
20  
21  
22  
23  
24  
25  
26  
27  
28  
29  
30  
31  
32  
33  
34  
35  
36  
37  
38  
39  
40  
41  
42  
43  
44  
45  
46  
47  
48  
49  
50  
51  
52  
53  
54  
55  
56  
57  
58  
59  
60

For peer review only

1  
2  
3  
4  
5  
6  
7  
8  
9  
10  
11  
12  
13  
14  
15  
16  
17  
18  
19  
20  
21  
22  
23  
24  
25  
26  
27  
28  
29  
30  
31  
32  
33  
34  
35  
36  
37  
38  
39  
40  
41  
42  
43  
44  
45  
46  
47  
48  
49  
50  
51  
52  
53  
54  
55  
56  
57  
58  
59  
60

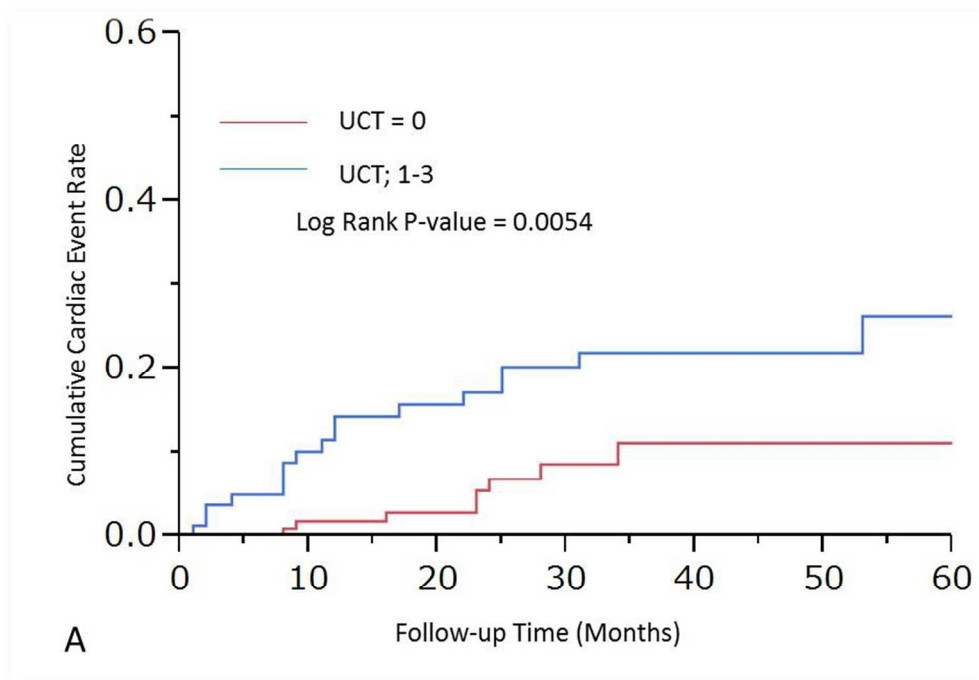

254x190mm (96 x 96 DPI)

Review only

1  
2  
3  
4  
5  
6  
7  
8  
9  
10  
11  
12  
13  
14  
15  
16  
17  
18  
19  
20  
21  
22  
23  
24  
25  
26  
27  
28  
29  
30  
31  
32  
33  
34  
35  
36  
37  
38  
39  
40  
41  
42  
43  
44  
45  
46  
47  
48  
49  
50  
51  
52  
53  
54  
55  
56  
57  
58  
59  
60

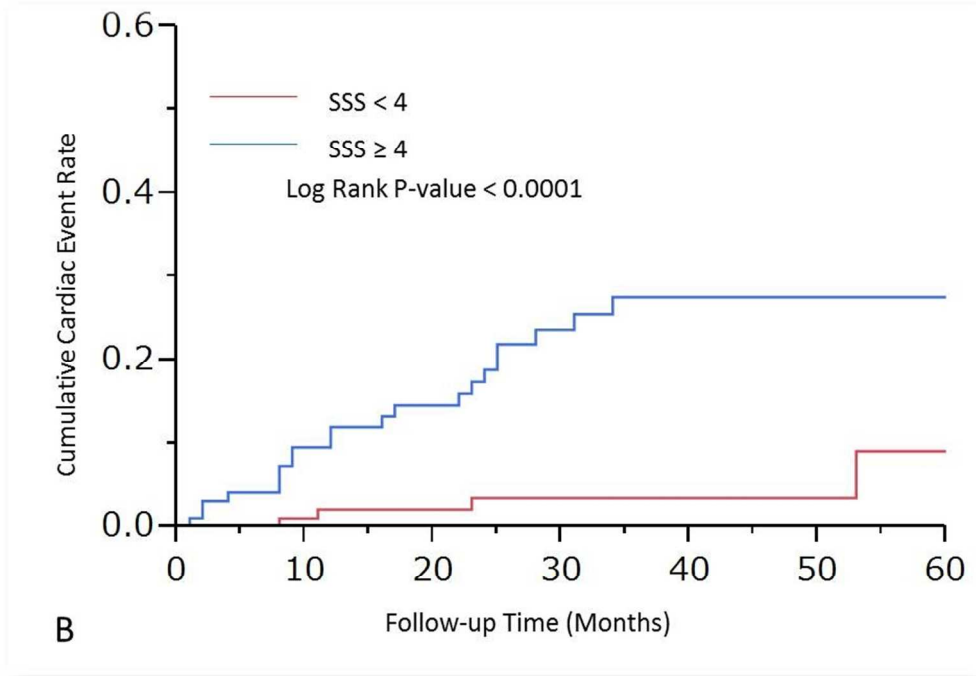

254x190mm (96 x 96 DPI)

Review only



1  
2  
3  
4  
5  
6  
7  
8  
9  
10  
11  
12  
13  
14  
15  
16  
17  
18  
19  
20  
21  
22  
23  
24  
25  
26  
27  
28  
29  
30  
31  
32  
33  
34  
35  
36  
37  
38  
39  
40  
41  
42  
43  
44  
45  
46  
47  
48  
49  
50  
51  
52  
53  
54  
55  
56  
57  
58  
59  
60

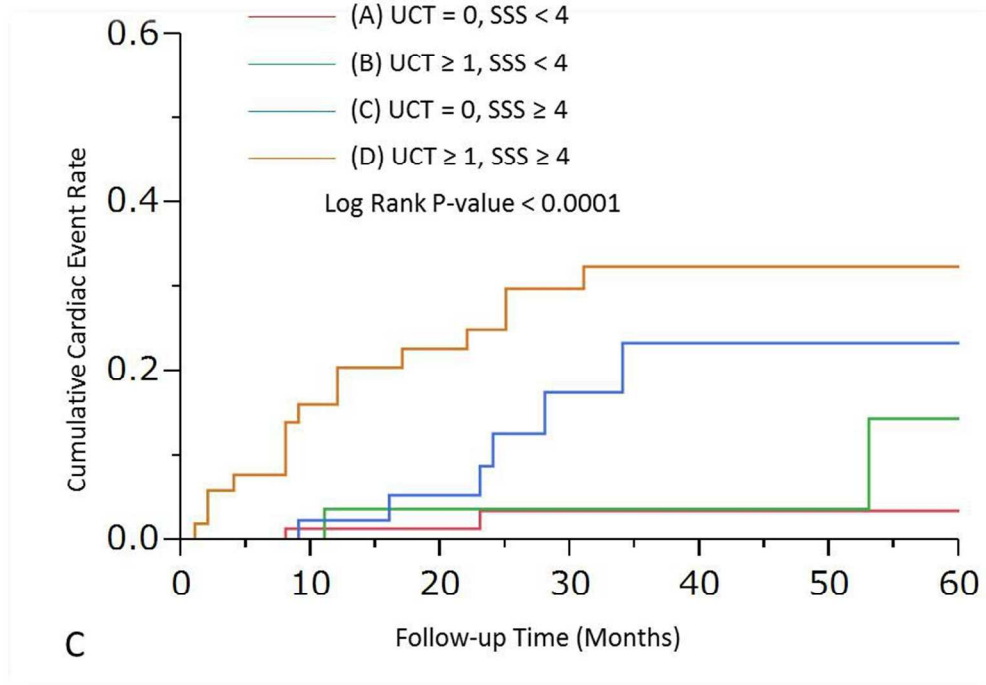

254x190mm (96 x 96 DPI)

Review only

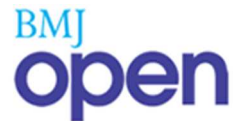

**Combination of Anatomical and Functional Evaluations  
Improves the Prediction of Cardiac Event in Coronary Artery  
Bypass Patients**

|                                 |                                                                                                                                                                                                                                                                                                                                                                                                                                                                                                                                                                                                                                                                                                                                                                                                                                                         |
|---------------------------------|---------------------------------------------------------------------------------------------------------------------------------------------------------------------------------------------------------------------------------------------------------------------------------------------------------------------------------------------------------------------------------------------------------------------------------------------------------------------------------------------------------------------------------------------------------------------------------------------------------------------------------------------------------------------------------------------------------------------------------------------------------------------------------------------------------------------------------------------------------|
| Journal:                        | <i>BMJ Open</i>                                                                                                                                                                                                                                                                                                                                                                                                                                                                                                                                                                                                                                                                                                                                                                                                                                         |
| Manuscript ID:                  | bmjopen-2013-003474.R1                                                                                                                                                                                                                                                                                                                                                                                                                                                                                                                                                                                                                                                                                                                                                                                                                                  |
| Article Type:                   | Research                                                                                                                                                                                                                                                                                                                                                                                                                                                                                                                                                                                                                                                                                                                                                                                                                                                |
| Date Submitted by the Author:   | 14-Aug-2013                                                                                                                                                                                                                                                                                                                                                                                                                                                                                                                                                                                                                                                                                                                                                                                                                                             |
| Complete List of Authors:       | Kawai, Hideki; Fujita Health University, Cardiology<br>Sarai, Masayoshi; Fujita Health University, Cardiology<br>Motoyama, Sadako; Fujita Health University, Cardiology<br>Ito, Hajime; Fujita Health University, Cardiology<br>Takada, Kayoko; Fujita Health University, Cardiology<br>Harigaya, Hiroto; Fujita Health University, Cardiology<br>Takahashi, Hiroshi; Fujita Health University, Medical Statistics<br>Hashimoto, Shuji; Fujita Health University, Hygiene<br>Takagi, Yasushi; Fujita Health University, Cardiovascular Surgery<br>Ando, Motomi; Fujita Health University, Cardiovascular Surgery<br>Anno, Hirofumi; Fujita Health University, Radiological Technology<br>Ishii, Junichi; Fujita Health University, Cardiology<br>Murohara, Toyoaki; Nagoya university, Cardiology<br>Ozaki, Yukio; Fujita Health University, Cardiology |
| <b>Primary Subject Heading</b>: | Cardiovascular medicine                                                                                                                                                                                                                                                                                                                                                                                                                                                                                                                                                                                                                                                                                                                                                                                                                                 |
| Secondary Subject Heading:      | Cardiovascular medicine                                                                                                                                                                                                                                                                                                                                                                                                                                                                                                                                                                                                                                                                                                                                                                                                                                 |
| Keywords:                       | Coronary heart disease < CARDIOLOGY, Ischaemic heart disease < CARDIOLOGY, Myocardial infarction < CARDIOLOGY                                                                                                                                                                                                                                                                                                                                                                                                                                                                                                                                                                                                                                                                                                                                           |
|                                 |                                                                                                                                                                                                                                                                                                                                                                                                                                                                                                                                                                                                                                                                                                                                                                                                                                                         |

SCHOLARONE™  
Manuscripts

1  
2  
3  
4 Combination of Anatomical and Functional Evaluations Improves the Prediction of Cardiac Event in  
5  
6  
7 Coronary Artery Bypass Patients  
8  
9  
10

11  
12 Hideki Kawai, MD\*, Masayoshi Sarai, MD, PhD\*, Sadako Motoyama, MD, PhD\*, Hajime Ito, MD\*,  
13  
14 Kayoko Takada, MD\*, Hiroto Harigaya MD, PhD\*, Hiroshi Takahashi, BSc<sup>&</sup>, Shuji Hashimoto, MD,  
15  
16 PhD<sup>§</sup>, Yasushi Takagi, MD, PhD<sup>§</sup>, Motomi Ando, MD, PhD<sup>§</sup>, Hirofumi Anno, MD, PhD<sup>†</sup>, Junichi  
17  
18 Ishii, MD, PhD\*, Toyoaki Murohara, MD, PhD<sup>‡</sup>, Yukio Ozaki, MD, PhD\*  
19  
20  
21  
22  
23  
24  
25  
26

27 Departments of \*Cardiology, &Medical Statistics, §Hygiene, \$Cardiovascular Surgery and  
28  
29 †Radiology, Fujita Health University, Toyoake, Japan; ‡Department of Cardiology, Nagoya  
30  
31 University Graduate School of Medicine  
32  
33  
34  
35  
36  
37  
38

39 Corresponding Author: Dr. Hideki Kawai, 1-98 Dengakugakubo, Kutsukake-cho, Toyoake, Aichi  
40  
41  
42 470-1192, Japan. E-mail: [hkawai@fujita-hu.ac.jp](mailto:hkawai@fujita-hu.ac.jp) Tel: +81-562-93-9298 Fax: +81-562-93-2315  
43  
44  
45  
46  
47

48 Key words: coronary-artery-bypass grafting, coronary computed tomography angiography,  
49  
50 myocardial perfusion imaging  
51  
52  
53  
54  
55

56 Word Count: 2547  
57  
58  
59  
60

1  
2  
3  
4 Article type: original article  
5  
6  
7  
8

9  
10 Title: Combination of Anatomical and Functional Evaluations Improves the Prediction of Cardiac  
11  
12 Event in Coronary Artery Bypass Patients  
13  
14

15  
16  
17  
18 Author names:  
19

20  
21 Hideki Kawai, MD\*, Masayoshi Sarai, MD, PhD\*, Sadako Motoyama, MD, PhD\*, Hajime Ito, MD\*,  
22  
23 Kayoko Takada, MD\*, Hiroto Harigaya MD, PhD\*, Hiroshi Takahashi, BSc<sup>&</sup>, Shuji Hashimoto, MD,  
24  
25 PhD<sup>§</sup>, Yasushi Takagi, MD, PhD<sup>§</sup>, Motomi Ando, MD, PhD<sup>§</sup>, Hirofumi Anno, MD, PhD<sup>†</sup>, Junichi  
26  
27 Ishii, MD, PhD\*, Toyoaki Murohara, MD, PhD<sup>‡</sup>, Yukio Ozaki, MD, PhD\*  
28  
29  
30  
31  
32  
33  
34  
35

36 Departments of \*Cardiology, &Medical Statistics, §Hygiene, \$Cardiovascular Surgery and  
37  
38 †Radiology, Fujita Health University, Toyoake, Japan; ‡Department of Cardiology, Nagoya  
39  
40 University Graduate School of Medicine  
41  
42  
43  
44  
45  
46  
47

48 Corresponding Author: Dr. Hideki Kawai, 1-98 Dengakugakubo, Kutsukake-cho, Toyoake, Aichi  
49  
50 470-1192, Japan. E-mail: [hkawai@fujita-hu.ac.jp](mailto:hkawai@fujita-hu.ac.jp) Tel: +81-562-93-9298 Fax: +81-562-93-2315  
51  
52  
53  
54

55  
56  
57 Key words: coronary-artery-bypass grafting, coronary computed tomography angiography,  
58  
59  
60

1  
2  
3  
4 myocardial perfusion imaging  
5  
6

7 Study approval: The study was approved by the Institutional Review Board and the ethics committee  
8  
9  
10 of Fujita Health University.  
11

12 Patient consent: We got all patients' consent.  
13  
14  
15  
16  
17  
18  
19  
20  
21  
22  
23  
24  
25  
26  
27  
28  
29  
30  
31  
32  
33  
34  
35

36 Abstract  
37  
38

39 Objective: To study the usefulness of combined risk stratification of coronary computed tomography  
40  
41 angiography (CTA) and myocardial perfusion imaging (MPI) in patients with previous  
42  
43 coronary-artery-bypass grafting (CABG).  
44  
45  
46  
47

48 Design: retrospective, observational, single center  
49

50  
51 Setting and Patients: 204 patients (84.3% male, mean age 68.7±7.6) undergoing CTA and MPI.  
52

53  
54 Main outcome measures: CTA defined unprotected coronary territories (UCT) (0, 1, 2, or 3) by  
55  
56 evaluating the number of significant stenoses which were defined as left main trunk  $\geq 50\%$  diameter  
57  
58  
59  
60

1  
2  
3  
4 stenosis, other native vessel stenosis  $\geq 70\%$ , or graft stenosis  $\geq 70\%$ . Using the cut-off value with  
5  
6  
7 receiver-operating characteristics analysis, all patients were divided into 4 groups: Group A (UCT =  
8  
9  
10 0, summed stress score [SSS]  $< 4$ ), Group B (UCT  $\geq 1$ , SSS  $< 4$ ), Group C (UCT = 0, SSS  $\geq 4$ ), and  
11  
12  
13 Group D (UCT  $\geq 1$ , SSS  $\geq 4$ ).

14  
15  
16 Results: Cardiac events, as a composite endpoint including cardiac death, nonfatal myocardial  
17  
18  
19 infarction, unstable angina requiring revascularization, and heart-failure hospitalization were  
20  
21  
22 observed in 27 patients for a median follow-up of 27.5 months. The annual event rates were 1.1%,  
23  
24  
25 2.0%, 5.7%, and 12.9% of patients in Group A, B, C, and D, respectively (Log Rank P-value  $<$   
26  
27  
28 0.0001). Adding UCT or SSS to a model with significant clinical factors including left ventricular  
29  
30  
31 ejection fraction, time since CABG, and Euro SCORE II improved the prediction of events, while  
32  
33  
34 adding both UCT and SSS to the model improved it greatly with increasing C-index, net  
35  
36  
37 reclassification improvement and integrated discrimination improvement.

38  
39  
40 Conclusions: The combination of anatomical and functional evaluations non-invasively enhances the  
41  
42  
43 predictive accuracy of cardiac events in CABG patients.  
44  
45  
46

#### 47 48 Article summary

##### 49 50 1) Article Focus

- 51  
52  
53  
54 ● To study the prognosis and predictors of previous coronary-artery-bypass grafting (CABG)  
55  
56  
57 patients.  
58

- 1  
2  
3  
4 ● Both coronary computed tomography angiography (CTA) and myocardial perfusion imaging  
5  
6 (MPI) are useful for the risk stratification with previous CABG patients.  
7  
8  
9  
10 ● It is usefulness to combine risk stratification of coronary computed tomography angiography  
11  
12 (CTA) and myocardial perfusion imaging (MPI) in patients with previous CABG.  
13  
14

## 15 16 17 18 19 2) Key Messages

- 20  
21 ● UCT defined by CTA, SSS by MPI, Left ventricular ejection fraction, time since CABG, and  
22  
23 Euro SCORE II were independent predictors.  
24  
25  
26  
27 ● Each CTA and MPI reflected the prognosis of CABG patients.  
28  
29  
30 ● The combination of anatomical (CTA) and functional (MPI) evaluations non-invasively enhances  
31  
32 the predictive accuracy of cardiac events in CABG patients. The advantages of each imaging  
33  
34 examination complement the limitations of the other.  
35  
36  
37  
38  
39  
40  
41  
42  
43  
44

## 45 3) Strengths and Limitations

- 46  
47 ● A limited number of patients in a single center were enrolled and were observed retrospectively.  
48  
49  
50 ● In a large number and prospective study, the usefulness and cost-effectiveness of combined  
51  
52 evaluation will be studied further.  
53  
54  
55  
56 ● We did not perform invasive coronary angiography in all studied patients. (The diagnosis of  
57  
58  
59  
60

1  
2  
3  
4 unprotected coronary territory based on CTA may contain some false-positives and/or  
5  
6  
7 false-negatives.)  
8  
9  
10

## 11 12 13 14 15 16 17 18 19 20 21 22 23 24 25 26 **【Introduction】** 27

28  
29 Coronary computed tomography angiography (CTA) is a useful tool not only for the detection of  
30  
31 obstructive coronary artery disease <sup>1-3</sup>, but also for the risk stratification of patients with coronary  
32  
33 artery disease <sup>4-5</sup>. Some studies using CTA have shown good diagnostic performance for the  
34  
35 detection of significant stenosis in grafts, with accuracy improved by the newer generation of CT  
36  
37 scanners <sup>6-9</sup>. Recently, Chow et al. and Small et al. demonstrated that CTA was of prognostic value in  
38  
39 patients with previous coronary-artery-bypass grafting (CABG) <sup>10-11</sup>. On the other hand, CTA has  
40  
41 some limitations in the evaluation of distal runoffs, metal clip artifacts, and native coronary segments  
42  
43 of nongrafted vessels, particularly due to the high prevalence of severe calcification in previous  
44  
45 CABG patients <sup>6,8</sup>.  
46  
47  
48  
49  
50  
51  
52  
53

54  
55 Myocardial perfusion imaging (MPI) has been also useful for the risk stratification of patients with  
56  
57  
58  
59  
60



1  
2  
3  
4 previous CABG<sup>12-14</sup>. MPI is regarded as the gold standard for the risk stratification of such patients  
5  
6  
7<sup>15</sup>, despite some limitations. Patients after CABG have a high prevalence of perfusion defects  
8  
9  
10 because of old myocardial infarction or ischemic areas resulting from coronary side branch occlusion,  
11  
12  
13 and so there is a low positive predictive value for prognostic evaluation.

14  
15  
16 In previous studies, Schuijf et al. showed that MPI and CTA provided different and complementary  
17  
18 information on patients with suspected CAD<sup>16</sup>. Werkhoven et al. concluded that combined  
19  
20 anatomical and functional assessment might allow improved risk stratification<sup>17</sup>. The purpose of the  
21  
22 present study was to assess the prognosis of CABG patients by CTA and MPI, and to determine the  
23  
24 efficacy of such combined anatomical and functional assessment.  
25  
26  
27  
28  
29  
30  
31  
32  
33  
34  
35

### 36 **【Methods】**

37  
38  
39 We studied 211 patients with a history of CABG. From January 2006 to October 2011, they  
40  
41 underwent both CTA and MPI within 3 months of each other, and their clinical endpoints were  
42  
43 followed. Exclusion criteria were: 1) complicating congenital heart disease; 2) after valve surgery or  
44  
45 left ventricular (LV) aneurysm resection; 3) known allergy to iodinated contrast agents; 4) severe  
46  
47 renal insufficiency not requiring hemodialysis (estimated glomerular filtration rate [eGFR] <30  
48  
49 mL/min/1.73m<sup>2</sup>). To determine the preoperative risk assessment of these patients, we used a logistic  
50  
51 European System for Cardiac Operative Risk Evaluation risk model (EuroSCORE II)<sup>18</sup>. The study  
52  
53  
54  
55  
56  
57  
58  
59  
60

1  
2  
3  
4 was approved by the Institutional Review Board and the ethics committee of Fujita Health  
5  
6  
7 University.

### 12 13 Coronary Computed Tomography Angiography

14  
15 In the first 27 patients, 64-slice CT (Aquilion 64, Toshiba Medical Systems, Otawara, Japan) was  
16  
17 used with a collimation of  $64 \times 0.5\text{mm}$ , rotation speed of 350, 375, 400msec, and retrospective  
18  
19 gating electrocardiogram (ECG). For the contrast enhanced scan, a total amount of 80 to 90 mL of  
20  
21  
22 gating electrocardiogram (ECG). For the contrast enhanced scan, a total amount of 80 to 90 mL of  
23  
24 contrast medium with an injection flow rate of 4 mL/second was injected, followed by a 40-mL  
25  
26 saline bolus chase. Volumetric data were reconstructed with segmented reconstruction <sup>9</sup>. In the  
27  
28 remaining 184 patients, 320-slice CT (Aquilion One Toshiba Medical Systems, Otawara, Japan) was  
29  
30 used with a collimation of  $320 \times 0.5\text{mm}$ , rotation speed of 350, 375, 400msec, and prospective  
31  
32 triggering ECG. A bolus of 1.1 mL/kg contrast medium was injected over 18 s, followed by a 20-mL  
33  
34 saline bolus chase. Volumetric data were reconstructed with half or segmented reconstruction <sup>19</sup>. All  
35  
36 scans were performed during a single breath-hold. Isosorbide dinitrate spray 1.25mg was provided  
37  
38 immediately before CTA. The effective radiation dose was  $12.7 \pm 9.1$  mSv ( $9.8 \pm 3.7$  mSv in  
39  
40 320-slice CT and  $32.6 \pm 10.4$  mSv in 64-slice CT). After acquisition of the reconstructed volumetric  
41  
42 data, images were transferred to a workstation (ZIOSTATION System 1000, Amin/ZIO, Tokyo,  
43  
44 Japan). On CT images, coronary arteries were divided into 15 segments based on the  
45  
46 recommendations of the American Heart Association <sup>20</sup>. All native coronary arteries and bypass  
47  
48  
49  
50  
51  
52  
53  
54  
55  
56  
57  
58  
59  
60

1  
2  
3  
4 grafts were evaluated by two experienced observers (SM and HI) unaware of the clinical history and  
5  
6  
7 MPI findings of the patients. Atherosclerotic lesions and stenoses were classified visually as mild (<  
8  
9 50% luminal diameter), moderate (50% to 69%), or severe ( $\geq 70\%$ ). Significant stenoses were  
10  
11 defined as left main trunk  $\geq 50\%$  diameter stenosis, other native vessel stenosis  $\geq 70\%$ , or graft  
12  
13 stenosis  $\geq 70\%$ . Native coronary segments (including stented segments) and grafts, that were not  
14  
15 assessable because of severe calcification and motion artifacts, were regarded as severe stenoses.  
16  
17  
18 Patients were categorized according to the number (0, 1, 2, or 3) of unprotected coronary territories  
19  
20 (UCT)<sup>10</sup>. Each patient had 3 coronary territories, corresponding to each major epicardial artery (left  
21  
22 anterior descending artery, circumflex artery or artery supplying the posterior descending artery  
23  
24 [right coronary artery or circumflex artery]) and their corresponding branches (diagonal and marginal  
25  
26 arteries). A coronary territory was deemed unprotected if: 1) an ungrafted native coronary artery had  
27  
28 a significant stenosis; 2) a significant stenosis in the native artery was distal to the graft insertion; or  
29  
30  
31  
32  
33  
34  
35  
36  
37  
38  
39  
40  
41  
42  
43  
44  
45  
46  
47  
48  
49  
50  
51  
52  
53  
54  
55  
56  
57  
58  
59  
60

### Stress-rest myocardial perfusion imaging

In all patients, stress-rest MPI using thallium (Tl) -201 was performed with adenosine stress<sup>21</sup>.  
Early single photon emission tomography (SPECT) was performed 10 min after the adenosine stress

1  
2  
3  
4 test; late SPECT was performed 4 h thereafter. SPECT images were acquired using a dual-headed  
5  
6  
7 SPECT gamma camera (ADAC VERTEX-plus; EPIC, USA). Tomographic reconstruction was  
8  
9  
10 performed using a standard filtered back-projection technique with a ramp filter to produce a  
11  
12  
13 transaxial tomogram. No scatter or attenuation correction was applied. From these transaxial  
14  
15  
16 tomograms, the long axis of the left ventricle was identified, and oblique-angled tomograms were  
17  
18  
19 generated (i.e., vertical long-axis, short-axis, and horizontal long-axis tomograms)<sup>22</sup>. Tl-201 uptake  
20  
21  
22 was graded subjectively in three orthogonal planes (short axis, horizontal long axis, vertical long  
23  
24  
25 axis) divided into 17 segments on a five-point scale (4 = absent uptake; 3 = severely, 2 = moderately,  
26  
27  
28 1 = mildly decreased uptake; 0 = normal uptake, respectively) on the post stress and delayed images  
29  
30  
31 displayed side by side by the consensus of two experienced observers (MS and HK) unaware of the  
32  
33  
34 clinical history and CTA findings of the patients<sup>19</sup>. The segmental perfusion scores during stress and  
35  
36  
37 rest were added together to calculate the summed stress score (SSS), the summed rest score (SRS),  
38  
39  
40 and the summed difference score (SDS).

#### 41 42 43 44 Patient follow-up:

45  
46  
47  
48 Patient follow-up data were gathered by observers blinded to the baseline CTA and MPI results  
49  
50  
51 using clinical visits or standardized telephone interviews. Cardiac events (cardiac death, nonfatal  
52  
53  
54 myocardial infarction, unstable angina requiring revascularization, and admission to a hospital due to  
55  
56  
57 heart failure) were regarded as clinical end points. Deaths were considered cardiac when the primary  
58  
59  
60

1  
2  
3  
4 cause of death was related to myocardial ischemia/infarction, heart failure or arrhythmia, and when a  
5  
6  
7 noncardiac cause of death could not be identified. Nonfatal myocardial infarction was defined as  
8  
9  
10 myocardial ischemia resulting in abnormal cardiac biomarkers (>99<sup>th</sup> percentile of the upper normal  
11  
12  
13 limits). Unstable angina was defined as acute chest pain with or without the presence of ECG  
14  
15 abnormalities, and negative cardiac enzyme levels <sup>23-24</sup>. Patients undergoing elective  
16  
17  
18 revascularization within 3 months after CTA or MPI (early elective revascularization) were excluded  
19  
20  
21 after enrollment.  
22  
23

#### 24 25 26 27 Statistical analysis:

28  
29  
30 All data were presented as the mean  $\pm$  SD for continuous variables and frequency (percentage) for  
31  
32  
33 categorical variables. The mean values for the two groups were compared with chi-square tests for  
34  
35  
36 categorical and Wilcoxon sum rank test for continuous variables. All analyses were performed with  
37  
38  
39 JMP Version 10, (SAS Institute Inc., Cary, NC, USA) and a p-value of < 0.05 was considered as  
40  
41  
42 statistically significant.  
43  
44

45 The prognosis of CABG patients was assessed in univariate and multivariate models based on UCT,  
46  
47  
48 SSS, and their combination. Receiver-operating characteristics (ROC) analysis was performed to  
49  
50  
51 determine cutoff values of UCT and SSS for cardiac events. Risk adjusted analyses were performed  
52  
53  
54 with Cox proportional hazard models to determine the independent prognostic value of UCT, SSS,  
55  
56  
57 and their combination by controlling for other predictors. Cumulative event rates were estimated  
58  
59  
60

1  
2  
3  
4 with the Kaplan-Meier method and were compared with the log-rank test.  
5

6  
7 The increased discriminative value after addition of UCT and/or SSS to the established clinical  
8  
9 risk factors was estimated using the C-index for ROC curve, net reclassification improvement (NRI),  
10  
11 and integrated discrimination improvement (IDI). The C-index is defined as the area under an ROC  
12  
13 curve between individual predicted probabilities and incidence of events, and is compared between  
14  
15 in a baseline model consisting of established clinical risk factors with  $p < 0.05$  by univariate Cox  
16  
17 analysis, and in an enriched model with UCT and/or SSS<sup>25</sup>. The NRI indicates relatively how many  
18  
19 patients show a decrease in their predicted probabilities for events, while the IDI represents the  
20  
21 average decrease in predicted probabilities for events after adding UCT and/or SSS into the baseline  
22  
23 model, respectively<sup>26</sup>.  
24  
25  
26  
27  
28  
29  
30  
31  
32  
33  
34  
35  
36  
37  
38

### 39 **【Results】**

40  
41  
42 Clinical characteristics:

43  
44  
45 In total, 204 patients (84.3% male, mean age  $68.7 \pm 7.6$  years) were enrolled after excluding 7  
46  
47 patients: 4 undergoing early elective revascularization within 3 months after imaging examination,  
48  
49 and 3 lost to follow-up. The mean follow-up period was  $30.3 \pm 17.6$  months (median; 27.5 months).  
50  
51  
52 Four patients who underwent early revascularization were excluded because we could not study their  
53  
54 natural histories after examination. In Table 1, baseline characteristics are listed in detail. At  
55  
56  
57  
58  
59  
60

1  
2  
3  
4 follow-up, cardiac events were observed in 27 patients (13.2%) with an annualized event rate of  
5  
6  
7 5.2% (3 patients with cardiac death, 9 patients with non-fatal infarction, 3 patients with unstable  
8  
9  
10 angina requiring revascularization, and 12 patients with heart failure). In the univariate Cox analysis,  
11  
12 LVEF determined by cardiac ultrasound [Hazard Ratio (HR): 0.936; 95% Confidence Interval (CI):  
13  
14 0.905 to 0.968;  $p = 0.0002$ ], time since CABG (HR: 1.01; 95% CI: 1.00-1.02;  $p=0.0008$ ), and  
15  
16 EuroSCORE II (HR: 1.29; 95% CI: 1.02-1.57;  $p=0.038$ ) were significant predictors of cardiac  
17  
18  
19  
20  
21  
22  
23  
24  
25  
26  
27  
28  
29  
30  
31  
32  
33  
34  
35  
36  
37  
38  
39  
40  
41  
42  
43  
44  
45  
46  
47  
48  
49  
50  
51  
52  
53  
54  
55  
56  
57  
58  
59  
60

#### CTA, MPI Findings and Analysis with the Combination of UCT and SSS

Mean UCT was  $0.51 \pm 0.72$ , and % uninterpretable segments on CTA were 0.4%, 7.37%, and 3.61% in grafts, LMT, and other coronary artery segments, respectively. Mean SSS, SRS, and SDS were  $7.03 \pm 8.65$ ,  $5.21 \pm 7.70$ , and  $1.82 \pm 3.23$ , respectively. Mean % fixed defects was 10.3%.

The UCT and SSS were significant predictors for cardiac events (HR: 2.52; 95% CI: 1.59 to 3.96;  $p=0.0001$  and HR: 1.08; 95% CI: 1.05 to 1.12;  $p < 0.0001$ , respectively). To maximize the predictive power of UCT and SSS, cut-off levels were determined as 1 for UCT [area under curve (AUC) = 0.71] and 4 for SSS (AUC = 0.76), respectively. Cumulative incidence rates for cardiac events are demonstrated in Figure 1A and 1B (log rank  $p$ -value = 0.0054 and  $< 0.0001$ , respectively). After adjustment for LVEF, time since CABG and EuroSCORE II, patients with  $UCT \geq 1$  had 2.34-fold higher risk of cardiac events (95% CI 1.01 to 5.89,  $p = 0.0465$ ). Similarly, patients with  $SSS \geq 4$  had

1  
2  
3  
4 3.36-fold higher risk of cardiac events (95% CI 1.18 to 12.12,  $p = 0.0217$ ) (Table 2a).  
5  
6  
7  
8

9  
10 Based on the CTA and MPI findings, we divided all patients into 4 groups: Group A (UCT = 0, SSS  
11 <4), Group B (UCT;  $\geq 1$ , SSS <4), Group C (UCT = 0, SSS  $\geq 4$ ), and Group D (UCT;  $\geq 1$ , SSS  $\geq 4$ ).  
12  
13 The annual event rates of cardiac events were 1.1%, 2.0%, 5.7%, and 12.9% of patients in group A,  
14  
15 B, C and D, respectively. Cardiac event curves are demonstrated in Figure 1C (log rank  $p$ -value <  
16  
17 0.0001). After adjustment for LVEF, time since CABG, and EuroSCORE II, patients with UCT  $\geq 1$   
18  
19 and SSS  $\geq 4$  had 6.84-fold (95% CI 1.83 to 44.50,  $p = 0.0026$ ) higher risk for cardiac events  
20  
21 compared to those with UCT = 0 and SSS < 4 (Table 2b).  
22  
23  
24  
25  
26  
27  
28  
29  
30  
31  
32

### 33 Discrimination of Each Predicting Models for Cardiac Events (Table 3)

34  
35  
36 Addition of UCT alone, SSS alone, and both UCT and SSS to a baseline model with clinical risk  
37  
38 factors consisting of LVEF, time since CABG, and EuroSCORE II significantly improved both the  
39  
40 NRI and IDI. However, C-index was significantly greater only in the model with both UCT and SSS  
41  
42 compared to the baseline model (0.834 vs. 0.768,  $p=0.045$ ). In addition, the NRI and IDI  
43  
44 significantly increased in the model containing both UCT and SSS even if compared to the model  
45  
46 containing UCT alone or SSS alone.  
47  
48  
49  
50  
51  
52  
53  
54  
55  
56  
57  
58  
59  
60



**【Discussion】**

We focused on the prognosis of CABG patients assessed by CTA and MPI, and the usefulness of this combination. The patients without unprotected territories on CTA and without perfusion defects on MPI have a good prognosis. The prognosis of patients with abnormal CTA (UCT;  $\geq 1$ ) and MPI (SSS  $\geq 4$ ) is significantly poorer than that of patients with normal CTA and MPI. Each examination has incremental prognostic value, and the combination of anatomical and functional evaluation facilitates non-invasive assessment of the prognosis of CABG patients. This improvement was indicated to be statistically significant by the increase in the NRI and IDI.

Several reports have shown the utility of MPI with assessment of the prognosis in CABG patients<sup>12-14</sup>, but there are some limitations.

First, many CABG patients have some abnormal findings on MPI, because of a history of prior myocardial infarctions, and others have ischemic territories with side branch occlusion even if the major coronary trees are protected. Actually in the present study, 48.5% of the enrolled patients had an abnormal MPI finding (SSS  $\geq 4$ ). To identify the patients with a poor prognosis strictly among those with MPI abnormalities, the evaluation of unprotected coronary territories on CTA was useful. The event rates were 33.3% in the abnormal CTA patients (Group D), in contrast to 12.5% in the normal CTA patients (Group C).

Importantly, MPI does not clarify the anatomy of grafts or native coronary arteries, even when high risk patients are identified. On the other hand, CTA provides information on grafts and unprotected

1  
2  
3  
4 native coronary arteries non-invasively, and in this way contributes to devising the most appropriate  
5  
6  
7 therapeutic strategy.

8  
9  
10 Several studies have also demonstrated the diagnostic accuracy of CTA in CABG patients <sup>6-9</sup>, and  
11  
12 two recent studies reported the prognostic value of CTA in CABG patients <sup>10-11</sup>. They concluded that  
13  
14  
15 assessment with CTA is of prognostic value in CABG patients, despite some limitations.

16  
17  
18 First, some difficulties remain regarding the diagnostic accuracy <sup>7-9</sup>. Indeed the diagnostic accuracy  
19  
20  
21 of graft segments is good, but CABG patients have a high prevalence of severe calcifications and  
22  
23  
24 stented segments in the native coronary arteries, leading to some overestimation of stenosis of the  
25  
26  
27 distal runoff segments of the protected coronary arteries, and unprotected native coronary arteries  
28  
29  
30 including stented segments. Actually in our study, unassessable native coronary or graft segments  
31  
32  
33 were regarded as severe stenosis, likely resulting in some overestimation of the number of  
34  
35  
36 unprotected coronary territories. In other words, some CTA findings in Group B patients (abnormal  
37  
38  
39 CTA and normal MPI) may be false positives. In a prior study, Chow et al. excluded cases with > 5  
40  
41  
42 unassessable segments. Actually, it is of use to add MPI in the assessment of patients with poor CTA  
43  
44  
45 images <sup>10</sup>.

46  
47  
48 Second, patients with normal CTA may experience any kind of cardiac event. Some patients with  
49  
50  
51 major branches protected have an ischemic or infarcted area due to prior myocardial infarction or  
52  
53  
54 side branch occlusion, and so the at risk area might cause fatal arrhythmia and heart failure in them  
55  
56  
57 even if the risk of ungrafted coronary events or graft failure is very low. The present study  
58  
59  
60

1  
2  
3  
4 demonstrates that the prognosis of patients with normal CTA and abnormal MPI (Group C) is poorer  
5  
6  
7 (event-free rate; 87.5%) than that of those with normal CTA and MPI (Group A: 97.3).  
8

9  
10 Finally, prior CTA studies lacked some necessary data<sup>10-11</sup>. Small et al. and Chow et al. did not  
11  
12 obtain data of the time since CABG<sup>10-11</sup> or the variety of graft types<sup>10</sup>. In prior prognostic studies of  
13  
14 MPI or CAG, time since CABG and the variety of grafts were identified as important predictors<sup>12-14</sup>.  
15  
16  
17 When the prognosis of CABG patients is discussed, information on the time since CABG and the  
18  
19 variety of grafts is indispensable.  
20  
21  
22  
23  
24  
25  
26

#### 27 Limitations:

28  
29  
30 This study has some limitations. First, a limited number of patients in a single center were enrolled  
31  
32 and were observed retrospectively. Additionally, small number of hard events including cardiac death  
33  
34 and nonfatal myocardial infarction was observed during follow-up. Second, we did not perform  
35  
36 invasive coronary angiography in all studied patients. The diagnosis of unprotected coronary  
37  
38 territory based on CTA may contain some false-positives and/or false-negatives. Last, due to the  
39  
40 lack of data regarding the medical therapy when cardiac events were occurred, we could not discuss  
41  
42 the appropriateness of medical therapy which may have influenced results.  
43  
44  
45  
46  
47  
48  
49  
50  
51  
52  
53  
54  
55  
56  
57  
58  
59  
60

**【Conclusions】**

Our results indicate that the combination of MPI and CTA is useful for the risk stratification of patients with previous CABG. The advantages of each imaging examination complement the limitations of the other. The combination of anatomical and functional evaluations enhances assessment of the prognosis of CABG patients non-invasively.

**【Acknowledgements】**

We have received no financial support, and have no financial relationship with industry.

There is no additional data available.

**【Authors' contribution】**

Hideki Kawai and Masayoshi Sarai evaluated myocardial perfusion imaging (MPI). Sadako Motoyama and Hajime Ito evaluated CT imaging. Kayoko Takada and Junichi Ishii did MPI exam. Hiroto Harigaya and Hirofumi Anno did CT exam. Hiroshi Takahashi and Shuji Hashimoto gave me some advices about statistics. Yasushi Takagi and Motomi Ando are CABG operators and attending doctors for most patients. Toyooki Murohara, and Yukio Ozaki conducted this study.

1  
2  
3  
4 Funding statement : no  
5

6  
7 Competing interests: no  
8

9  
10 Trial Registration number (for clinical trials): no  
11

12  
13 Data sharing: No additional data available.  
14

15  
16  
17  
18  
19  
20  
21 References  
22

- 23  
24 1. Miller JM, Rochitte CE, Dewey M, et al. Diagnostic performance of coronary angiography by  
25  
26 64-row CT. *N Engl J Med*. 2008; 359 (22): 2324-36  
27  
28  
29  
30 2. de Graaf FR, Schuijf JD, van Velzen JE, et al. Diagnostic accuracy of 320-row multidetector  
31  
32 computed tomography coronary angiography in the non-invasive evaluation of significant  
33  
34 coronary artery disease. *Eur Heart J*. 2010;31(15):1908-15.  
35  
36  
37  
38 3. Motoyama S, Anno H, Sarai M, et al. Noninvasive coronary angiography with a prototype  
39  
40 256-row area detector computed tomography system: comparison with conventional invasive  
41  
42 coronary angiography. *J Am Coll Cardiol*. 2008; 51(7): 773-5  
43  
44  
45  
46 4. Hulten EA, Carbonaro S, Petrillo SP, et al. Prognostic value of cardiac computed tomography  
47  
48 angiography: a systematic review and meta-analysis. *J Am Coll Cardiol*. 2011; 57(10): 1237-47  
49  
50  
51  
52 5. Chow BJ, Wells GA, Chen L, et al. Prognostic value of 64-slice cardiac computed tomography  
53  
54 severity of coronary artery disease, coronary atherosclerosis, and left ventricular ejection  
55  
56  
57  
58

- 1  
2  
3  
4 fraction. *J Am Coll Cardiol*. 2010; 55(10): 1017-28  
5  
6  
7 6. Malagutti P, Nieman K, Meijboom WB, et al. Use of 64-slice CT in symptomatic patients after  
8  
9 coronary bypass surgery: evaluation of grafts and coronary arteries. *Eur Heart J*. 2007;  
10  
11 28(15):1879-85.  
12  
13  
14  
15 7. de Graaf FR, van Velzen JE, Witkowska AJ, et al. Diagnostic performance of 320-slice  
16  
17 multidetector computed tomography coronary angiography in patients after coronary artery  
18  
19 bypass grafting. *Eur Radiol*. 2011 Nov; 21(11):2285-96.  
20  
21  
22  
23  
24 8. Weustink AC, Nieman K, Pugliese F, et al. Diagnostic accuracy of computed tomography  
25  
26 angiography in patients after bypass grafting: comparison with invasive coronary angiography.  
27  
28 *JACC Cardiovasc Imaging*. 2009; 2 (7): 816-24.  
29  
30  
31  
32  
33 9. Tochii M, Takagi Y, Anno H, et al. Accuracy of 64-slice multidetector computed tomography for  
34  
35 diseased coronary artery graft detection. *Ann Thorac Surg* 2010; 89: 1906-11  
36  
37  
38  
39 10. Chow BJ, Ahmed O, Small G, et al. Prognostic value of CT angiography in coronary bypass  
40  
41 patients. *JACC Cardiovasc Imaging*. 2011; 4(5): 496-502.  
42  
43  
44  
45 11. Small GR, Yam Y, Chen L, et al. Prognostic assessment of coronary artery bypass patients with  
46  
47 64-slice computed tomography angiography: anatomical information is incremental to clinical  
48  
49 risk prediction. *J Am Coll Cardiol*. 2011; 58(23): 2389-95.  
50  
51  
52  
53  
54  
55  
56  
57  
58  
59  
60

- 1  
2  
3  
4 12. Miller TD, Christian TF, Hodge DO, et al. Prognostic value of exercise thallium-201 imaging  
5  
6 performed within 2 years of coronary artery bypass graft surgery. *J Am Coll Cardiol.* 1998;  
7  
8 31(4):848-54.  
9  
10  
11  
12 13. Palmas W, Bingham S, Diamond GA, et al. Incremental prognostic value of exercise  
13  
14 thallium-201 myocardial single-photon emission computed tomography late after coronary  
15  
16 artery bypass surgery. *J Am Coll Cardiol.* 1995; 25(2):403-9.  
17  
18  
19  
20  
21 22. 14. Lauer MS, Lytle B, Pashkow F, et al. Prediction of death and myocardial infarction by screening  
22  
23 with exercise-thallium testing after coronary-artery-bypass grafting. *Lancet.* 1998;  
24  
25 351(9103):615-22.  
26  
27  
28  
29  
30 31. 15. Klocke FJ, Baird MG, Lorell BH, et al. ACC/AHA/ASNC guidelines for the clinical use of  
31  
32 cardiac radionuclide imaging--executive summary: a report of the American College of  
33  
34 Cardiology/American Heart Association Task Force on Practice Guidelines (ACC/AHA/ASNC  
35  
36 Committee to Revise the 1995 Guidelines for the Clinical Use of Cardiac Radionuclide Imaging).  
37  
38 American College of Cardiology; American Heart Association Task Force on Practice  
39  
40 Guidelines; American Society for Nuclear Cardiology. *Circulation.* 2003; 108(11):1404-18.  
41  
42  
43  
44  
45  
46  
47  
48 49. 16. Schuijf JD, Wijns W, Jukema JW, et al. Relationship between noninvasive coronary angiography  
49  
50 with multi-slice computed tomography and myocardial perfusion imaging. *J Am Coll Cardiol.*  
51  
52 2006; 48(12):2508-14.  
53  
54  
55  
56  
57  
58  
59  
60

- 1  
2  
3  
4 17. van Werkhoven JM, Schuijf JD, Gaemperli O, et al. Prognostic value of multislice computed  
5  
6  
7 tomography and gated single-photon emission computed tomography in patients with suspected  
8  
9  
10 coronary artery disease. *J Am Coll Cardiol.* 2009; 53(7):623-32.
- 11  
12 18. Nashef SA, Roques F, Sharples LD, et al. EuroSCORE II. *Eur J Cardiothorac Surg.* 2012; 41(4):  
13  
14 734-44
- 15  
16  
17 19. Takagi Y, Akita K, Kondo H, et al. Non-invasive Evaluation of Internal Thoracic Artery  
18  
19  
20 Anastomosed to the Left Anterior Descending Artery with 320-Detector Row Computed  
21  
22 Tomography and Adenosine Thallium-201 Myocardial Perfusion Scintigraphy. *Ann Thorac*  
23  
24  
25 Cardiovasc Surg. 2012; 18(1):24-30.
- 26  
27  
28 20. A reporting system on patients evaluated for coronary artery disease. Report of the Ad Hoc  
29  
30  
31  
32  
33 Committee for Grading of Coronary Artery Disease, Council on Cardiovascular Surgery,  
34  
35  
36 American Heart Association. *Circulation* 1975; 51: 5-40
- 37  
38  
39 21. Nishimura S, Mahmorian JJ, Boyce TM, et al. Quantitative thallium-201 single-photon emission  
40  
41  
42 computed tomography during maximal pharmacologic coronary vasodilation with adenosine for  
43  
44  
45 assessing coronary artery disease. *J Am Coll Cardiol.* 1991 (3):736-45.
- 46  
47  
48 22. Cerqueira MD, Weissman NJ, Dilsizian V, et al. Standardized myocardial segmentation and  
49  
50  
51 nomenclature for tomographic imaging of the heart: a statement for healthcare professionals  
52  
53  
54 from the Cardiac Imaging Committee of the Council on Clinical Cardiology of the American  
55  
56  
57  
58  
59  
60



- 1  
2  
3  
4 Heart Association. American Heart Association Writing Group on Myocardial Segmentation and  
5  
6  
7 Registration for Cardiac Imaging. *Circulation*. 2002; 105(4):539-42.  
8  
9  
10 23. Rapezzi C, Biagini E, Branzi A. Guidelines for the diagnosis and treatment of non-ST-segment  
11  
12 elevation acute coronary syndromes: the task force for the diagnosis and treatment of  
13  
14 non-ST-segment elevation acute coronary syndromes of the European Society of Cardiology. *Eur*  
15  
16 *Heart J*. 2008 (2):277-8.  
17  
18  
19  
20  
21 24. O'Connor RE, Brady W, Brooks SC, et al. Part 10: acute coronary syndromes: 2010 American  
22  
23  
24 Heart Association Guidelines for Cardiopulmonary Resuscitation and Emergency  
25  
26  
27 Cardiovascular Care. *Circulation*. 2010; 122(18 Suppl 3): S787-817.  
28  
29  
30 25. DeLong ER, DeLong DM, Clarke-Pearson DL. Correlated Receiver Operating Characteristic  
31  
32  
33 Curves: A Nonparametric Approach. *Biometrics* 1988; 44: 837-45  
34  
35  
36 26. Pencina MJ, D'Agostino RB Sr, D'Agostino RB Jr, et al. Evaluating the added predictive ability  
37  
38  
39 of a new marker: from area under the ROC curve to reclassification and beyond. *Stat Med*. 2008;  
40  
41  
42 27(29: 157-72)  
43  
44  
45  
46  
47  
48  
49  
50  
51  
52  
53  
54  
55  
56  
57  
58  
59  
60

## Figure legends

Figure 1. Cardiac event curves according to (A) UCT, (B) SSS, (C) each group

UCT: unprotected coronary territory, SSS: summed stress score

Table 1. Patient Characteristics

|                             | All<br>(n=204) | Cardiac Events<br>(n=27) | No Events<br>(n=177) | p Value |
|-----------------------------|----------------|--------------------------|----------------------|---------|
| Age (years)                 | 68.7±7.6       | 70.0±7.7                 | 68.5±7.6             | 0.46    |
| Gender (male)               | 172 (84.3%)    | 21 (77.8%)               | 151 (85.3%)          | 0.527   |
| Diabetes                    | 106 (52.0%)    | 17 (63.0%)               | 89 (50.3%)           | 0.234   |
| Dyslipidemia                | 116 (56.9%)    | 18 (66.7%)               | 98 (55.4%)           | 0.214   |
| Hypertension                | 172 (84.3%)    | 24 (88.9%)               | 148 (83.6%)          | 0.673   |
| Hemodialysis                | 9 (4.4%)       | 2 (7.4%)                 | 7 (4.0%)             | 0.229   |
| Current Smoker              | 39 (19.1%)     | 5 (18.5%)                | 34 (19.2%)           | 0.905   |
| LVEF (%)                    | 52.1±9.9       | 44.9±11.5                | 53.2±9.3             | 0.0002  |
| Time since CABG<br>(months) | 25.3±51.2      | 55.8±66.7                | 20.7±47.0            | 0.0008  |
| Prior MI                    | 34 (16.7%)     | 8 (29.6%)                | 26 (14.7%)           | 0.08    |
| Post PCI                    | 23 (11.3%)     | 5 (18.5%)                | 18 (10.2%)           | 0.319   |
| Prior HF                    | 17 (8.3%)      | 3 (11.1%)                | 14 (7.9%)            | 0.539   |

|              |             |            |             |       |
|--------------|-------------|------------|-------------|-------|
| Using ITA    | 191 (93.6%) | 23 (85.2%) | 168 (94.9%) | 0.089 |
| EuroSCORE II | 1.90±1.32   | 2.43±1.69  | 1.81±1.24   | 0.038 |

LVEF: left ventricular ejection fraction by ultrasonic cardiography, CABG: coronary aorta bypass graft, MI: myocardial infarction, PCI: percutaneous coronary intervention, HF: heart failure, ITA: internal thoracic artery

Table 2a. CTA, MPI Findings: Univariable and Multivariate Analysis for Cardiac Events

|         | Cardiac<br>Events<br>(n=27) | No Events<br>(n=177) | Annual<br>Event<br>Rate, % | Unadjusted<br>Hazards Ratio<br>(95%CI) | P value | Adjusted<br>Hazards Ratio<br>(95%CI) | P value |
|---------|-----------------------------|----------------------|----------------------------|----------------------------------------|---------|--------------------------------------|---------|
| UCT=0   | 8<br>(6.5%)                 | 115<br>(93.5%)       | 2.82                       | 1                                      |         | 1                                    |         |
| UCT ≥ 1 | 19<br>(23.5%)               | 62<br>(76.5%)        | 8.27                       | 3.07<br>(1.38-7.49)                    | 0.0054  | 2.34#<br>(1.01-5.89)                 | 0.0465  |
| SSS < 4 | 4<br>(3.8%)                 | 101<br>(96.2%)       | 1.44                       | 1                                      |         | 1                                    |         |
| SSS ≥ 4 | 23<br>(23.2%)               | 76<br>(76.8%)        | 9.67                       | 6.73<br>(2.59-22.96)                   | <0.0001 | 3.36&<br>(1.18-12.12)                | 0.0217  |

UCT: unprotected coronary territory, SSS: summed stress score, # Hazards ratio was adjusted for LVEF, time since CABG, EuroSCORE II, and SSS, & Hazards ratio was adjusted for LVEF, time since CABG, EuroSCORE II, and UCT. Eight events in patients with UCT=0 included 3 nonfatal MI and 5 HF, 19 events in

UCT $\geq$ 1 included 3 cardiac death, 6 nonfatal MI, 3 late revascularization, and 7 heart failure. Four events in patients with SSS $<$ 4 included 3 nonfatal MI and 1 late revascularization, 23 events in SSS $\geq$ 4 included 3 cardiac death, 6 nonfatal MI, 2 late revascularization, and 12 heart failure.

Table 2b. Combination of UCT and SSS: (Univariable and Multivariate Analysis for Cardiac Events)

| Group | UCT      | SSS      | No of patients | No of patients with Cardiac Events (%) | Annual Event Rate (%) | Unadjusted hazards ratio (95%CI) | P value | Adjusted hazards ratio\$ (95%CI) | P value |
|-------|----------|----------|----------------|----------------------------------------|-----------------------|----------------------------------|---------|----------------------------------|---------|
| A     | 0        | <4       | 75             | 2(2.7)                                 | 1.1                   | 1                                |         | 1                                |         |
| B     | $\geq$ 1 | <4       | 30             | 2(6.7)                                 | 2.0                   | 1.93<br>(0.23-16.16)             | 0.515   | 1.76<br>(0.21-15.11)             | 0.579   |
| C     | 0        | $\geq$ 4 | 48             | 6(13.0)                                | 5.7                   | 5.15<br>(1.19-35.17)             | 0.0279  | 2.73<br>(0.55-19.93)             | 0.225   |
| D     | $\geq$ 1 | $\geq$ 4 | 51             | 17(33.0)                               | 12.9                  | 11.9<br>(3.40-75.19)             | <0.0001 | 6.84<br>(1.83-44.5)              | 0.0026  |

\$ Hazards ratio was adjusted for LVEF, time since CABG, and EuroSCORE II

Table 3. Discrimination of Each Predicting Models for Cardiac Events

| Risk Factors and Imaging Findings | Discrimination         |           |           |         |           |         |
|-----------------------------------|------------------------|-----------|-----------|---------|-----------|---------|
|                                   | C Index (95%CI)        | p Value   | NRI       | p Value | IDI       | p Value |
| Clinical risk factors#            | 0.768<br>(0.655-0.880) | Reference | Reference |         | Reference |         |
| Clinical risk factors# plus UCT   | 0.811<br>(0.718-0.905) | 0.1049    | 0.707     | 0.0003* | 0.0369    | 0.0235  |
| Clinical risk factors# plus SSS   | 0.807<br>(0.701-0.912) | 0.1156    | 0.731     | 0.0002* | 0.0421    | 0.0005  |

|                                            |                        |           |           |         |           |        |
|--------------------------------------------|------------------------|-----------|-----------|---------|-----------|--------|
| Clinical risk factors#<br>plus UCT and SSS | 0.834<br>(0.742-0.927) | 0.0454*   | 0.649     | 0.0008* | 0.0701    | 0.0006 |
| Clinical risk factors# plus UCT            |                        | Reference | Reference |         | Reference |        |
| Clinical risk factors#<br>plus UCT and SSS |                        | 0.1989    | 0.707     | 0.0003* | 0.0281    | 0.039  |
| Clinical risk factors# plus SSS            |                        | Reference | Reference |         | Reference |        |
| Clinical risk factors#<br>plus UCT and SSS |                        | 0.1486    | 0.645     | 0.0009* | 0.0333    | 0.0009 |

UCT: unprotected coronary territory, SSS: summed stress score, NRI: Net Reclassification Improvement, IDI:

Integrated Discrimination Improvement

#Clinical risk factors comprise LVEF, time since CABG, and EuroSCORE II

1  
2  
3  
4  
5  
6  
7  
8  
9  
10  
11  
12  
13  
14  
15  
16  
17  
18  
19  
20  
21  
22  
23  
24  
25  
26  
27  
28  
29  
30  
31  
32  
33  
34  
35  
36  
37  
38  
39  
40  
41  
42  
43  
44  
45  
46  
47  
48  
49  
50  
51  
52  
53  
54  
55  
56  
57  
58  
59  
60

For peer review only

1  
2  
3  
4 Combination of Anatomical and Functional Evaluations Improves the Prediction of Cardiac Event in  
5  
6  
7 Coronary Artery Bypass Patients  
8  
9  
10

11  
12 Hideki Kawai, MD\*, Masayoshi Sarai, MD, PhD\*, Sadako Motoyama, MD, PhD\*, Hajime Ito, MD\*,  
13  
14 Kayoko Takada, MD\*, Hiroto Harigaya MD, PhD\*, Hiroshi Takahashi, BSc<sup>&</sup>, Shuji Hashimoto, MD,  
15  
16 PhD<sup>§</sup>, Yasushi Takagi, MD, PhD<sup>§</sup>, Motomi Ando, MD, PhD<sup>§</sup>, Hirofumi Anno, MD, PhD<sup>†</sup>, Junichi  
17  
18 Ishii, MD, PhD\*, Toyoaki Murohara, MD, PhD<sup>‡</sup>, Yukio Ozaki, MD, PhD\*  
19  
20  
21  
22  
23  
24  
25  
26

27 Departments of \*Cardiology, &Medical Statistics, §Hygiene, \$Cardiovascular Surgery and  
28  
29 †Radiology, Fujita Health University, Toyoake, Japan; ‡Department of Cardiology, Nagoya  
30  
31 University Graduate School of Medicine  
32  
33  
34  
35  
36  
37  
38

39 Corresponding Author: Dr. Hideki Kawai, 1-98 Dengakugakubo, Kutsukake-cho, Toyoake, Aichi  
40  
41  
42 470-1192, Japan. E-mail: [hkawai@fujita-hu.ac.jp](mailto:hkawai@fujita-hu.ac.jp) Tel: +81-562-93-9298 Fax: +81-562-93-2315  
43  
44  
45  
46  
47

48 Key words: coronary-artery-bypass grafting, coronary computed tomography angiography,  
49  
50 myocardial perfusion imaging  
51  
52  
53  
54  
55

56 Word Count: 2547  
57  
58  
59  
60



1  
2  
3  
4 Article type: original article  
5  
6  
7  
8

9  
10 Title: Combination of Anatomical and Functional Evaluations Improves the Prediction of Cardiac  
11  
12 Event in Coronary Artery Bypass Patients  
13  
14

15  
16  
17  
18 Author names:  
19

20  
21 Hideki Kawai, MD\*, Masayoshi Sarai, MD, PhD\*, Sadako Motoyama, MD, PhD\*, Hajime Ito, MD\*,  
22  
23 Kayoko Takada, MD\*, Hiroto Harigaya MD, PhD\*, Hiroshi Takahashi, BSc<sup>&</sup>, Shuji Hashimoto, MD,  
24  
25 PhD<sup>§</sup>, Yasushi Takagi, MD, PhD<sup>§</sup>, Motomi Ando, MD, PhD<sup>§</sup>, Hirofumi Anno, MD, PhD<sup>†</sup>, Junichi  
26  
27 Ishii, MD, PhD\*, Toyoaki Murohara, MD, PhD<sup>‡</sup>, Yukio Ozaki, MD, PhD\*  
28  
29  
30  
31  
32  
33  
34  
35

36 Departments of \*Cardiology, &Medical Statistics, §Hygiene, \$Cardiovascular Surgery and  
37  
38 †Radiology, Fujita Health University, Toyoake, Japan; ‡Department of Cardiology, Nagoya  
39  
40 University Graduate School of Medicine  
41  
42  
43  
44  
45  
46  
47

48 Corresponding Author: Dr. Hideki Kawai, 1-98 Dengakugakubo, Kutsukake-cho, Toyoake, Aichi  
49  
50 470-1192, Japan. E-mail: [hkawai@fujita-hu.ac.jp](mailto:hkawai@fujita-hu.ac.jp) Tel: +81-562-93-9298 Fax: +81-562-93-2315  
51  
52  
53  
54

55  
56  
57 Key words: coronary-artery-bypass grafting, coronary computed tomography angiography,  
58  
59  
60

1  
2  
3  
4 myocardial perfusion imaging  
5

6  
7 Study approval: The study was approved by the Institutional Review Board and the ethics committee  
8  
9  
10 of Fujita Health University.  
11

12  
13 Patient consent: We got all patients' consent.  
14  
15  
16  
17  
18  
19  
20  
21  
22  
23  
24  
25  
26  
27  
28  
29  
30  
31  
32  
33  
34  
35

36 Abstract  
37

38  
39 Objective: To study the usefulness of combined risk stratification of coronary computed tomography  
40  
41 angiography (CTA) and myocardial perfusion imaging (MPI) in patients with previous  
42  
43 coronary-artery-bypass grafting (CABG).  
44  
45  
46

47  
48 Design: retrospective, observational, single center  
49

50  
51 Setting and Patients: 204 patients (84.3% male, mean age 68.7±7.6) undergoing CTA and MPI.  
52

53  
54 Main outcome measures: CTA defined unprotected coronary territories (UCT) (0, 1, 2, or 3) by  
55  
56 evaluating the number of significant stenoses which were defined as left main trunk  $\geq 50\%$  diameter  
57  
58  
59  
60

1  
2  
3  
4 stenosis, other native vessel stenosis  $\geq 70\%$ , or graft stenosis  $\geq 70\%$ . Using the cut-off value with  
5  
6  
7 receiver-operating characteristics analysis, all patients were divided into 4 groups: Group A (UCT =  
8  
9  
10 0, summed stress score [SSS]  $< 4$ ), Group B (UCT  $\geq 1$ , SSS  $< 4$ ), Group C (UCT = 0, SSS  $\geq 4$ ), and  
11  
12  
13 Group D (UCT  $\geq 1$ , SSS  $\geq 4$ ).

14  
15  
16 Results: Cardiac events, as a composite endpoint including cardiac death, nonfatal myocardial  
17  
18  
19 infarction, unstable angina requiring revascularization, and heart-failure hospitalization were  
20  
21  
22 observed in 27 patients for a median follow-up of 27.5 months. The annual event rates were 1.1%,  
23  
24  
25 2.0%, 5.7%, and 12.9% of patients in Group A, B, C, and D, respectively (Log Rank P-value  $<$   
26  
27  
28 0.0001). Adding UCT or SSS to a model with significant clinical factors including left ventricular  
29  
30  
31 ejection fraction, time since CABG, and Euro SCORE II improved the prediction of events, while  
32  
33  
34 adding both UCT and SSS to the model improved it greatly with increasing C-index, net  
35  
36  
37 reclassification improvement and integrated discrimination improvement.

38  
39  
40 Conclusions: The combination of anatomical and functional evaluations non-invasively enhances the  
41  
42  
43 predictive accuracy of cardiac events in CABG patients.  
44  
45  
46

47  
48 Article summary

49  
50  
51 1) Article Focus

- 52  
53  
54 ● To study the prognosis and predictors of previous coronary-artery-bypass grafting (CABG)  
55  
56  
57 patients.  
58  
59  
60

- 1  
2  
3  
4 ● Both coronary computed tomography angiography (CTA) and myocardial perfusion imaging  
5  
6 (MPI) are useful for the risk stratification with previous CABG patients.  
7  
8  
9  
10 ● It is usefulness to combine risk stratification of coronary computed tomography angiography  
11  
12 (CTA) and myocardial perfusion imaging (MPI) in patients with previous CABG.  
13  
14  
15  
16  
17  
18  
19

## 2) Key Messages

- 20  
21 ● UCT defined by CTA, SSS by MPI, Left ventricular ejection fraction, time since CABG, and  
22  
23 Euro SCORE II were independent predictors.  
24  
25  
26  
27 ● Each CTA and MPI reflected the prognosis of CABG patients.  
28  
29  
30 ● The combination of anatomical (CTA) and functional (MPI) evaluations non-invasively enhances  
31  
32 the predictive accuracy of cardiac events in CABG patients. The advantages of each imaging  
33  
34 examination complement the limitations of the other.  
35  
36  
37  
38  
39  
40  
41  
42  
43  
44

## 3) Strengths and Limitations

- 45  
46 ● A limited number of patients in a single center were enrolled and were observed retrospectively.  
47  
48  
49 ● In a large number and prospective study, the usefulness and cost-effectiveness of combined  
50  
51 evaluation will be studied further.  
52  
53  
54  
55  
56 ● We did not perform invasive coronary angiography in all studied patients. (The diagnosis of  
57  
58  
59  
60

1  
2  
3  
4 unprotected coronary territory based on CTA may contain some false-positives and/or  
5  
6  
7 false-negatives.)  
8  
9  
10  
11  
12  
13  
14  
15  
16  
17  
18  
19  
20  
21  
22  
23  
24

## 25 26 **【Introduction】** 27

28  
29 Coronary computed tomography angiography (CTA) is a useful tool not only for the detection of  
30  
31 obstructive coronary artery disease <sup>1-3</sup>, but also for the risk stratification of patients with coronary  
32  
33 artery disease <sup>4-5</sup>. Some studies using CTA have shown good diagnostic performance for the  
34  
35 detection of significant stenosis in grafts, with accuracy improved by the newer generation of CT  
36  
37 scanners <sup>6-9</sup>. Recently, Chow et al. and Small et al. demonstrated that CTA was of prognostic value in  
38  
39 patients with previous coronary-artery-bypass grafting (CABG) <sup>10-11</sup>. On the other hand, CTA has  
40  
41 some limitations in the evaluation of distal runoffs, metal clip artifacts, and native coronary segments  
42  
43 of nongrafted vessels, particularly due to the high prevalence of severe calcification in previous  
44  
45 CABG patients <sup>6,8</sup>.  
46  
47  
48  
49  
50  
51  
52  
53

54  
55 Myocardial perfusion imaging (MPI) has been also useful for the risk stratification of patients with  
56  
57  
58  
59  
60

1  
2  
3  
4 previous CABG<sup>12-14</sup>. MPI is regarded as the gold standard for the risk stratification of such patients  
5  
6  
7<sup>15</sup>, despite some limitations. Patients after CABG have a high prevalence of perfusion defects  
8  
9  
10 because of old myocardial infarction or ischemic areas resulting from coronary side branch occlusion,  
11  
12  
13 and so there is a low positive predictive value for prognostic evaluation.

14  
15 In previous studies, Schuijf et al. showed that MPI and CTA provided different and complementary  
16  
17 information on patients with suspected CAD<sup>16</sup>. Werkhoven et al. concluded that combined  
18  
19 anatomical and functional assessment might allow improved risk stratification<sup>17</sup>. The purpose of the  
20  
21 present study was to assess the prognosis of CABG patients by CTA and MPI, and to determine the  
22  
23 efficacy of such combined anatomical and functional assessment.  
24  
25  
26  
27  
28  
29  
30  
31  
32  
33  
34  
35

### 36 **【Methods】**

37  
38 We studied 211 patients with a history of CABG. From January 2006 to October 2011, they  
39  
40 underwent both CTA and MPI within 3 months of each other, and their clinical endpoints were  
41  
42 followed. Exclusion criteria were: 1) complicating congenital heart disease; 2) after valve surgery or  
43  
44 left ventricular (LV) aneurysm resection; 3) known allergy to iodinated contrast agents; 4) severe  
45  
46 renal insufficiency not requiring hemodialysis (estimated glomerular filtration rate [eGFR] <30  
47  
48 mL/min/1.73m<sup>2</sup>). To determine the preoperative risk assessment of these patients, we used a logistic  
49  
50 European System for Cardiac Operative Risk Evaluation risk model (EuroSCORE II)<sup>18</sup>. The study  
51  
52  
53  
54  
55  
56  
57  
58  
59  
60

1  
2  
3  
4 was approved by the Institutional Review Board and the ethics committee of Fujita Health  
5  
6  
7 University.

### 12 13 Coronary Computed Tomography Angiography

14  
15 In the first 27 patients, 64-slice CT (Aquilion 64, Toshiba Medical Systems, Otawara, Japan) was  
16  
17 used with a collimation of  $64 \times 0.5\text{mm}$ , rotation speed of 350, 375, 400msec, and retrospective  
18  
19 **gating** electrocardiogram (ECG). For the contrast enhanced scan, a total amount of 80 to 90 mL of  
20  
21  
22 contrast medium with an injection flow rate of 4 mL/second was injected, followed by a 40-mL  
23  
24 saline bolus chase. Volumetric data were reconstructed with segmented reconstruction <sup>9</sup>. In the  
25  
26 remaining 184 patients, 320-slice CT (Aquilion One Toshiba Medical Systems, Otawara, Japan) was  
27  
28 used with a collimation of  $320 \times 0.5\text{mm}$ , rotation speed of 350, 375, 400msec, and prospective  
29  
30 triggering ECG. A bolus of 1.1 mL/kg contrast medium was injected over 18 s, followed by a 20-mL  
31  
32 saline bolus chase. Volumetric data were reconstructed with half or segmented reconstruction <sup>19</sup>. All  
33  
34 scans were performed during a single breath-hold. **Isosorbide dinitrate spray 1.25mg was provided**  
35  
36 **immediately before CTA**. The effective radiation dose was  $12.7 \pm 9.1$  mSv ( $9.8 \pm 3.7$  mSv in  
37  
38 320-slice CT and  $32.6 \pm 10.4$  mSv in 64-slice CT). After acquisition of the reconstructed volumetric  
39  
40 data, images were transferred to a workstation (ZIOSTATION System 1000, Amin/ZIO, Tokyo,  
41  
42 Japan). On CT images, coronary arteries were divided into 15 segments based on the  
43  
44  
45  
46  
47  
48  
49  
50  
51  
52  
53  
54  
55  
56  
57  
58  
59  
60 recommendations of the American Heart Association <sup>20</sup>. All native coronary arteries and bypass

1  
2  
3  
4 grafts were evaluated by two experienced observers (SM and HI) unaware of the clinical history and  
5  
6  
7 MPI findings of the patients. Atherosclerotic lesions and stenoses were classified visually as mild (<  
8  
9  
10 50% luminal diameter), moderate (50% to 69%), or severe ( $\geq 70\%$ ). Significant stenoses were  
11  
12  
13 defined as left main trunk  $\geq 50\%$  diameter stenosis, other native vessel stenosis  $\geq 70\%$ , or graft  
14  
15  
16 stenosis  $\geq 70\%$ . Native coronary segments (including stented segments) and grafts, that were not  
17  
18  
19 assessable because of severe calcification and motion artifacts, were regarded as severe stenoses.  
20  
21  
22 Patients were categorized according to the number (0, 1, 2, or 3) of unprotected coronary territories  
23  
24 (UCT) <sup>10</sup>. Each patient had 3 coronary territories, corresponding to each major epicardial artery (left  
25  
26  
27 anterior descending artery, circumflex artery or artery supplying the posterior descending artery  
28  
29  
30 [right coronary artery or circumflex artery]) and their corresponding branches (diagonal and marginal  
31  
32  
33 arteries). A coronary territory was deemed unprotected if: 1) an ungrafted native coronary artery had  
34  
35  
36 a significant stenosis; 2) a significant stenosis in the native artery was distal to the graft insertion; or  
37  
38  
39 3) a native artery and its graft both had significant stenoses.  
40  
41  
42  
43  
44  
45  
46  
47  
48  
49  
50

#### 51 Stress-rest myocardial perfusion imaging

52  
53  
54 In all patients, stress-rest MPI using thallium (Tl) -201 was performed with adenosine stress <sup>21</sup>.  
55  
56  
57 Early single photon emission tomography (SPECT) was performed 10 min after the adenosine stress  
58  
59  
60



1  
2  
3  
4 test; late SPECT was performed 4 h thereafter. SPECT images were acquired using a dual-headed  
5  
6  
7 SPECT gamma camera (ADAC VERTEX-plus; EPIC, USA). Tomographic reconstruction was  
8  
9  
10 performed using a standard filtered back-projection technique with a ramp filter to produce a  
11  
12  
13 transaxial tomogram. No scatter or attenuation correction was applied. From these transaxial  
14  
15  
16 tomograms, the long axis of the left ventricle was identified, and oblique-angled tomograms were  
17  
18  
19 generated (i.e., vertical long-axis, short-axis, and horizontal long-axis tomograms)<sup>22</sup>. Tl-201 uptake  
20  
21 was graded subjectively in three orthogonal planes (short axis, horizontal long axis, vertical long  
22  
23  
24 axis) divided into 17 segments on a five-point scale (4 = absent uptake; 3 = severely, 2 = moderately,  
25  
26  
27 1 = mildly decreased uptake; 0 = normal uptake, respectively) on the post stress and delayed images  
28  
29  
30 displayed side by side by the consensus of two experienced observers (MS and HK) unaware of the  
31  
32  
33 clinical history and CTA findings of the patients<sup>19</sup>. The segmental perfusion scores during stress and  
34  
35  
36 rest were added together to calculate the summed stress score (SSS), the summed rest score (SRS),  
37  
38  
39 and the summed difference score (SDS).

#### 44 Patient follow-up:

45  
46  
47 Patient follow-up data were gathered by observers blinded to the baseline CTA and MPI results  
48  
49  
50 using clinical visits or standardized telephone interviews. Cardiac events (cardiac death, nonfatal  
51  
52  
53 myocardial infarction, unstable angina requiring revascularization, and admission to a hospital due to  
54  
55  
56 heart failure) were regarded as clinical end points. Deaths were considered cardiac when the primary  
57  
58  
59  
60

1  
2  
3  
4 cause of death was related to myocardial ischemia/infarction, heart failure or arrhythmia, and when a  
5  
6  
7 noncardiac cause of death could not be identified. Nonfatal myocardial infarction was defined as  
8  
9  
10 myocardial ischemia resulting in abnormal cardiac biomarkers (>99<sup>th</sup> percentile of the upper normal  
11  
12  
13 limits). Unstable angina was defined as acute chest pain with or without the presence of ECG  
14  
15 abnormalities, and negative cardiac enzyme levels <sup>23-24</sup>. Patients undergoing elective  
16  
17  
18 revascularization within 3 months after CTA or MPI (early elective revascularization) were excluded  
19  
20  
21 after enrollment.  
22

#### 23 24 25 26 27 Statistical analysis:

28  
29  
30 All data were presented as the mean  $\pm$  SD for continuous variables and frequency (percentage) for  
31  
32  
33 categorical variables. The mean values for the two groups were compared with chi-square tests for  
34  
35  
36 categorical and Wilcoxon sum rank test for continuous variables. All analyses were performed with  
37  
38  
39 JMP Version 10, (SAS Institute Inc., Cary, NC, USA) and a p-value of < 0.05 was considered as  
40  
41  
42 statistically significant.  
43

44  
45 The prognosis of CABG patients was assessed in univariate and multivariate models based on UCT,  
46  
47  
48 SSS, and their combination. Receiver-operating characteristics (ROC) analysis was performed to  
49  
50  
51 determine cutoff values of UCT and SSS for cardiac events. Risk adjusted analyses were performed  
52  
53  
54 with Cox proportional hazard models to determine the independent prognostic value of UCT, SSS,  
55  
56  
57 and their combination by controlling for other predictors. Cumulative event rates were estimated  
58  
59  
60

1  
2  
3  
4 with the Kaplan-Meier method and were compared with the log-rank test.  
5

6  
7 The increased discriminative value after addition of UCT and/or SSS to the established clinical  
8  
9 risk factors was estimated using the C-index for ROC curve, net reclassification improvement (NRI),  
10  
11 and integrated discrimination improvement (IDI). The C-index is defined as the area under an ROC  
12  
13 curve between individual predicted probabilities and incidence of events, and is compared between  
14  
15 in a baseline model consisting of established clinical risk factors with  $p < 0.05$  by univariate Cox  
16  
17 analysis, and in an enriched model with UCT and/or SSS<sup>25</sup>. The NRI indicates relatively how many  
18  
19 patients show a decrease in their predicted probabilities for events, while the IDI represents the  
20  
21 average decrease in predicted probabilities for events after adding UCT and/or SSS into the baseline  
22  
23 model, respectively<sup>26</sup>.  
24  
25  
26  
27  
28  
29  
30  
31  
32  
33  
34  
35  
36  
37  
38

### 39 **【Results】**

40  
41  
42 Clinical characteristics:

43  
44  
45 In total, 204 patients (84.3% male, mean age  $68.7 \pm 7.6$  years) were enrolled after excluding 7  
46  
47 patients: 4 undergoing early elective revascularization within 3 months after imaging examination,  
48  
49 and 3 lost to follow-up. The mean follow-up period was  $30.3 \pm 17.6$  months (median; 27.5 months).  
50  
51

52  
53  
54 **Four patients who underwent early revascularization were excluded because we could not study their**  
55  
56 **natural histories after examination.** In Table 1, baseline characteristics are listed in detail. At  
57  
58

1  
2  
3  
4 follow-up, cardiac events were observed in 27 patients (13.2%) with an annualized event rate of  
5  
6  
7 5.2% (3 patients with cardiac death, 9 patients with non-fatal infarction, 3 patients with unstable  
8  
9  
10 angina requiring revascularization, and 12 patients with heart failure). In the univariate Cox analysis,  
11  
12 LVEF determined by cardiac ultrasound [Hazard Ratio (HR): 0.936; 95% Confidence Interval (CI):  
13  
14 0.905 to 0.968;  $p = 0.0002$ ], time since CABG (HR: 1.01; 95% CI: 1.00-1.02;  $p=0.0008$ ), and  
15  
16 EuroSCORE II (HR: 1.29; 95% CI: 1.02-1.57;  $p=0.038$ ) were significant predictors of cardiac  
17  
18  
19 events.  
20  
21  
22  
23  
24  
25  
26

#### 27 CTA, MPI Findings and Analysis with the Combination of UCT and SSS

28  
29  
30 Mean UCT was  $0.51 \pm 0.72$ , and % uninterpretable segments on CTA were 0.4%, 7.37%, and  
31  
32 3.61% in grafts, LMT, and other coronary artery segments, respectively. Mean SSS, SRS, and SDS  
33  
34 were  $7.03 \pm 8.65$ ,  $5.21 \pm 7.70$ , and  $1.82 \pm 3.23$ , respectively. Mean % fixed defects was 10.3%.  
35  
36  
37  
38

39 The UCT and SSS were significant predictors for cardiac events (HR: 2.52; 95% CI: 1.59 to 3.96;  
40  
41  $p=0.0001$  and HR: 1.08; 95% CI: 1.05 to 1.12;  $p < 0.0001$ , respectively). To maximize the predictive  
42  
43 power of UCT and SSS, cut-off levels were determined as 1 for UCT [area under curve (AUC) =  
44  
45 0.71] and 4 for SSS (AUC = 0.76), respectively. Cumulative incidence rates for cardiac events are  
46  
47  
48 demonstrated in Figure 1A and 1B (log rank  $p$ -value = 0.0054 and  $< 0.0001$ , respectively). After  
49  
50  
51 adjustment for LVEF, time since CABG and EuroSCORE II, patients with  $UCT \geq 1$  had 2.34-fold  
52  
53  
54 higher risk of cardiac events (95% CI 1.01 to 5.89,  $p = 0.0465$ ). Similarly, patients with  $SSS \geq 4$  had  
55  
56  
57  
58  
59  
60

1  
2  
3  
4 3.36-fold higher risk of cardiac events (95% CI 1.18 to 12.12,  $p = 0.0217$ ) (Table 2a).  
5  
6  
7  
8

9  
10 Based on the CTA and MPI findings, we divided all patients into 4 groups: Group A (UCT = 0, SSS  
11 <4), Group B (UCT;  $\geq 1$ , SSS <4), Group C (UCT = 0, SSS  $\geq 4$ ), and Group D (UCT;  $\geq 1$ , SSS  $\geq 4$ ).  
12  
13 The annual event rates of cardiac events were 1.1%, 2.0%, 5.7%, and 12.9% of patients in group A,  
14  
15 B, C and D, respectively. Cardiac event curves are demonstrated in Figure 1C (log rank  $p$ -value <  
16  
17 0.0001). After adjustment for LVEF, time since CABG, and EuroSCORE II, patients with UCT  $\geq 1$   
18  
19 and SSS  $\geq 4$  had 6.84-fold (95% CI 1.83 to 44.50,  $p = 0.0026$ ) higher risk for cardiac events  
20  
21 compared to those with UCT = 0 and SSS < 4 (Table 2b).  
22  
23  
24  
25  
26  
27  
28  
29  
30  
31  
32

### 33 Discrimination of Each Predicting Models for Cardiac Events (Table 3)

34  
35  
36 Addition of UCT alone, SSS alone, and both UCT and SSS to a baseline model with clinical risk  
37  
38 factors consisting of LVEF, time since CABG, and EuroSCORE II significantly improved both the  
39  
40 NRI and IDI. However, C-index was significantly greater only in the model with both UCT and SSS  
41  
42 compared to the baseline model (0.834 vs. 0.768,  $p=0.045$ ). In addition, the NRI and IDI  
43  
44 significantly increased in the model containing both UCT and SSS even if compared to the model  
45  
46 containing UCT alone or SSS alone.  
47  
48  
49  
50  
51  
52  
53  
54  
55  
56  
57  
58  
59  
60

## 【Discussion】

We focused on the prognosis of CABG patients assessed by CTA and MPI, and the usefulness of this combination. The patients without unprotected territories on CTA and without perfusion defects on MPI have a good prognosis. The prognosis of patients with abnormal CTA (UCT;  $\geq 1$ ) and MPI (SSS  $\geq 4$ ) is significantly poorer than that of patients with normal CTA and MPI. Each examination has incremental prognostic value, and the combination of anatomical and functional evaluation facilitates non-invasive assessment of the prognosis of CABG patients. This improvement was indicated to be statistically significant by the increase in the NRI and IDI.

Several reports have shown the utility of MPI with assessment of the prognosis in CABG patients<sup>12-14</sup>, but there are some limitations.

First, many CABG patients have some abnormal findings on MPI, because of a history of prior myocardial infarctions, and others have ischemic territories with side branch occlusion even if the major coronary trees are protected. Actually in the present study, 48.5% of the enrolled patients had an abnormal MPI finding (SSS  $\geq 4$ ). To identify the patients with a poor prognosis strictly among those with MPI abnormalities, the evaluation of unprotected coronary territories on CTA was useful. The event rates were 33.3% in the abnormal CTA patients (Group D), in contrast to 12.5% in the normal CTA patients (Group C).

Importantly, MPI does not clarify the anatomy of grafts or native coronary arteries, even when high risk patients are identified. On the other hand, CTA provides information on grafts and unprotected

1  
2  
3  
4 native coronary arteries non-invasively, and in this way contributes to devising the most appropriate  
5  
6  
7 therapeutic strategy.

8  
9  
10 Several studies have also demonstrated the diagnostic accuracy of CTA in CABG patients <sup>6-9</sup>, and  
11  
12 two recent studies reported the prognostic value of CTA in CABG patients <sup>10-11</sup>. They concluded that  
13  
14 assessment with CTA is of prognostic value in CABG patients, despite some limitations.

15  
16  
17 First, some difficulties remain regarding the diagnostic accuracy <sup>7-9</sup>. Indeed the diagnostic accuracy  
18  
19 of graft segments is good, but CABG patients have a high prevalence of severe calcifications and  
20  
21 stented segments in the native coronary arteries, leading to some overestimation of stenosis of the  
22  
23 distal runoff segments of the protected coronary arteries, and unprotected native coronary arteries  
24  
25 including stented segments. Actually in our study, unassessable native coronary or graft segments  
26  
27 were regarded as severe stenosis, likely resulting in some overestimation of the number of  
28  
29 unprotected coronary territories. In other words, some CTA findings in Group B patients (abnormal  
30  
31 CTA and normal MPI) may be false positives. In a prior study, Chow et al. excluded cases with > 5  
32  
33 unassessable segments. Actually, it is of use to add MPI in the assessment of patients with poor CTA  
34  
35 images <sup>10</sup>.

36  
37  
38 Second, patients with normal CTA may experience any kind of cardiac event. Some patients with  
39  
40 major branches protected have an ischemic or infarcted area due to prior myocardial infarction or  
41  
42 side branch occlusion, and so the at risk area might cause fatal arrhythmia and heart failure in them  
43  
44 even if the risk of ungrafted coronary events or graft failure is very low. The present study  
45  
46  
47  
48  
49  
50  
51  
52  
53  
54  
55  
56  
57  
58  
59  
60

1  
2  
3  
4 demonstrates that the prognosis of patients with normal CTA and abnormal MPI (Group C) is poorer  
5  
6  
7 (event-free rate; 87.5%) than that of those with normal CTA and MPI (Group A: 97.3).  
8

9  
10 Finally, prior CTA studies lacked some necessary data <sup>10-11</sup>. Small et al. and Chow et al. did not  
11  
12 obtain data of the time since CABG <sup>10-11</sup> or the variety of graft types <sup>10</sup>. In prior prognostic studies of  
13  
14 MPI or CAG, time since CABG and the variety of grafts were identified as important predictors <sup>12-14</sup>.  
15  
16  
17 When the prognosis of CABG patients is discussed, information on the time since CABG and the  
18  
19 variety of grafts is indispensable.  
20  
21  
22  
23  
24  
25  
26

#### 27 Limitations:

28  
29  
30 This study has some limitations. First, a limited number of patients in a single center were enrolled  
31  
32 and were observed retrospectively. **Additionally, small number of hard events including cardiac death**  
33  
34 **and nonfatal myocardial infarction was observed during follow-up.** Second, we did not perform  
35  
36  
37  
38  
39  
40  
41  
42  
43  
44  
45  
46  
47  
48  
49  
50  
51  
52  
53  
54  
55  
56  
57  
58  
59  
60  
invasive coronary angiography in all studied patients. The diagnosis of unprotected coronary  
territory based on CTA may contain some false-positives and/or false-negatives. **Last, due to the**  
**lack of data regarding the medical therapy when cardiac events were occurred, we could not discuss**  
**the appropriateness of medical therapy which may have influenced results.**



**【Conclusions】**

Our results indicate that the combination of MPI and CTA is useful for the risk stratification of patients with previous CABG. The advantages of each imaging examination complement the limitations of the other. The combination of anatomical and functional evaluations enhances assessment of the prognosis of CABG patients non-invasively.

**【Acknowledgements】**

We have received no financial support, and have no financial relationship with industry.

There is no additional data available.

**【Authors' contribution】**

Hideki Kawai and Masayoshi Sarai evaluated myocardial perfusion imaging (MPI). Sadako Motoyama and Hajime Ito evaluated CT imaging. Kayoko Takada and Junichi Ishii did MPI exam. Hiroto Harigaya and Hirofumi Anno did CT exam. Hiroshi Takahashi and Shuji Hashimoto gave me some advices about statistics. Yasushi Takagi and Motomi Ando are CABG operators and attending doctors for most patients. Toyoaki Murohara, and Yukio Ozaki conducted this study.

1  
2  
3  
4 Funding statement : no  
5

6  
7 Competing interests: no  
8

9  
10 Trial Registration number (for clinical trials): no  
11

12  
13 Data sharing: No additional data available.  
14

15  
16  
17  
18  
19  
20  
21 References  
22

- 23  
24 1. Miller JM, Rochitte CE, Dewey M, et al. Diagnostic performance of coronary angiography by  
25  
26 64-row CT. N Engl J Med. 2008; 359 (22): 2324-36  
27  
28  
29  
30 2. de Graaf FR, Schuijf JD, van Velzen JE, et al. Diagnostic accuracy of 320-row multidetector  
31  
32 computed tomography coronary angiography in the non-invasive evaluation of significant  
33  
34 coronary artery disease. Eur Heart J. 2010;31(15):1908-15.  
35  
36  
37  
38 3. Motoyama S, Anno H, Sarai M, et al. Noninvasive coronary angiography with a prototype  
39  
40 256-row area detector computed tomography system: comparison with conventional invasive  
41  
42 coronary angiography. J Am Coll Cardiol. 2008; 51(7): 773-5  
43  
44  
45  
46  
47 4. Hulten EA, Carbonaro S, Petrillo SP, et al. Prognostic value of cardiac computed tomography  
48  
49 angiography: a systematic review and meta-analysis. J Am Coll Cardiol. 2011; 57(10): 1237-47  
50  
51  
52  
53 5. Chow BJ, Wells GA, Chen L, et al. Prognostic value of 64-slice cardiac computed tomography  
54  
55 severity of coronary artery disease, coronary atherosclerosis, and left ventricular ejection  
56  
57  
58  
59  
60

fraction. *J Am Coll Cardiol.* 2010; 55(10): 1017-28

6. Malagutti P, Nieman K, Meijboom WB, et al. Use of 64-slice CT in symptomatic patients after coronary bypass surgery: evaluation of grafts and coronary arteries. *Eur Heart J.* 2007; 28(15):1879-85.
7. de Graaf FR, van Velzen JE, Witkowska AJ, et al. Diagnostic performance of 320-slice multidetector computed tomography coronary angiography in patients after coronary artery bypass grafting. *Eur Radiol.* 2011 Nov; 21(11):2285-96.
8. Weustink AC, Nieman K, Pugliese F, et al. Diagnostic accuracy of computed tomography angiography in patients after bypass grafting: comparison with invasive coronary angiography. *JACC Cardiovasc Imaging.* 2009; 2 (7): 816-24.
9. Tochii M, Takagi Y, Anno H, et al. Accuracy of 64-slice multidetector computed tomography for diseased coronary artery graft detection. *Ann Thorac Surg* 2010; 89: 1906-11
10. Chow BJ, Ahmed O, Small G, et al. Prognostic value of CT angiography in coronary bypass patients. *JACC Cardiovasc Imaging.* 2011; 4(5): 496-502.
11. Small GR, Yam Y, Chen L, et al. Prognostic assessment of coronary artery bypass patients with 64-slice computed tomography angiography: anatomical information is incremental to clinical risk prediction. *J Am Coll Cardiol.* 2011; 58(23): 2389-95.

- 1  
2  
3  
4 12. Miller TD, Christian TF, Hodge DO, et al. Prognostic value of exercise thallium-201 imaging  
5  
6 performed within 2 years of coronary artery bypass graft surgery. *J Am Coll Cardiol.* 1998;  
7  
8 31(4):848-54.  
9  
10  
11  
12 13. Palmas W, Bingham S, Diamond GA, et al. Incremental prognostic value of exercise  
13  
14 thallium-201 myocardial single-photon emission computed tomography late after coronary  
15  
16 artery bypass surgery. *J Am Coll Cardiol.* 1995; 25(2):403-9.  
17  
18  
19  
20  
21 22. 14. Lauer MS, Lytle B, Pashkow F, et al. Prediction of death and myocardial infarction by screening  
23  
24 with exercise-thallium testing after coronary-artery-bypass grafting. *Lancet.* 1998;  
25  
26 351(9103):615-22.  
27  
28  
29  
30 31. 15. Klocke FJ, Baird MG, Lorell BH, et al. ACC/AHA/ASNC guidelines for the clinical use of  
32  
33 cardiac radionuclide imaging--executive summary: a report of the American College of  
34  
35 Cardiology/American Heart Association Task Force on Practice Guidelines (ACC/AHA/ASNC  
36  
37 Committee to Revise the 1995 Guidelines for the Clinical Use of Cardiac Radionuclide Imaging).  
38  
39 American College of Cardiology; American Heart Association Task Force on Practice  
40  
41 Guidelines; American Society for Nuclear Cardiology. *Circulation.* 2003; 108(11):1404-18.  
42  
43  
44  
45  
46  
47 48. 16. Schuijf JD, Wijns W, Jukema JW, et al. Relationship between noninvasive coronary angiography  
49  
50 with multi-slice computed tomography and myocardial perfusion imaging. *J Am Coll Cardiol.*  
51  
52 2006; 48(12):2508-14.  
53  
54  
55  
56  
57  
58  
59  
60

- 1  
2  
3  
4 17. van Werkhoven JM, Schuijf JD, Gaemperli O, et al. Prognostic value of multislice computed  
5  
6  
7 tomography and gated single-photon emission computed tomography in patients with suspected  
8  
9  
10 coronary artery disease. *J Am Coll Cardiol.* 2009; 53(7):623-32.  
11
- 12  
13 18. Nashef SA, Roques F, Sharples LD, et al. EuroSCORE II. *Eur J Cardiothorac Surg.* 2012; 41(4):  
14  
15  
16 734-44  
17
- 18  
19 19. Takagi Y, Akita K, Kondo H, et al. Non-invasive Evaluation of Internal Thoracic Artery  
20  
21  
22 Anastomosed to the Left Anterior Descending Artery with 320-Detector Row Computed  
23  
24  
25 Tomography and Adenosine Thallium-201 Myocardial Perfusion Scintigraphy. *Ann Thorac*  
26  
27  
28 *Cardiovasc Surg.* 2012; 18(1):24-30.  
29
- 30  
31 20. A reporting system on patients evaluated for coronary artery disease. Report of the Ad Hoc  
32  
33  
34 Committee for Grading of Coronary Artery Disease, Council on Cardiovascular Surgery,  
35  
36  
37 American Heart Association. *Circulation* 1975; 51: 5-40  
38
- 39  
40 21. Nishimura S, Mahmorian JJ, Boyce TM, et al. Quantitative thallium-201 single-photon emission  
41  
42  
43 computed tomography during maximal pharmacologic coronary vasodilation with adenosine for  
44  
45  
46 assessing coronary artery disease. *J Am Coll Cardiol.* 1991 (3):736-45.  
47
- 48  
49 22. Cerqueira MD, Weissman NJ, Dilsizian V, et al. Standardized myocardial segmentation and  
50  
51  
52 nomenclature for tomographic imaging of the heart: a statement for healthcare professionals  
53  
54  
55 from the Cardiac Imaging Committee of the Council on Clinical Cardiology of the American  
56  
57  
58  
59  
60

- 1  
2  
3  
4 Heart Association. American Heart Association Writing Group on Myocardial Segmentation and  
5  
6  
7 Registration for Cardiac Imaging. *Circulation*. 2002; 105(4):539-42.  
8  
9  
10 23. Rapezzi C, Biagini E, Branzi A. Guidelines for the diagnosis and treatment of non-ST-segment  
11  
12 elevation acute coronary syndromes: the task force for the diagnosis and treatment of  
13  
14 non-ST-segment elevation acute coronary syndromes of the European Society of Cardiology. *Eur*  
15  
16  
17  
18  
19 *Heart J*. 2008 (2):277-8.  
20  
21 24. O'Connor RE, Brady W, Brooks SC, et al. Part 10: acute coronary syndromes: 2010 American  
22  
23  
24 Heart Association Guidelines for Cardiopulmonary Resuscitation and Emergency  
25  
26  
27  
28  
29  
30  
31 25. DeLong ER, DeLong DM, Clarke-Pearson DL. Correlated Receiver Operating Characteristic  
32  
33  
34  
35  
36  
37  
38  
39  
40  
41  
42  
43  
44  
45  
46  
47  
48  
49  
50  
51  
52  
53  
54  
55  
56  
57  
58  
59  
60
26. Pencina MJ, D'Agostino RB Sr, D'Agostino RB Jr, et al. Evaluating the added predictive ability  
of a new marker: from area under the ROC curve to reclassification and beyond. *Stat Med*. 2008;  
27(29: 157-72)

## Figure legends

Figure 1. Cardiac event curves according to (A) UCT, (B) SSS, (C) each group

UCT: unprotected coronary territory, SSS: summed stress score

Table 1. Patient Characteristics

|                             | All<br>(n=204) | Cardiac Events<br>(n=27) | No Events<br>(n=177) | p Value |
|-----------------------------|----------------|--------------------------|----------------------|---------|
| Age (years)                 | 68.7±7.6       | 70.0±7.7                 | 68.5±7.6             | 0.46    |
| Gender (male)               | 172 (84.3%)    | 21 (77.8%)               | 151 (85.3%)          | 0.527   |
| Diabetes                    | 106 (52.0%)    | 17 (63.0%)               | 89 (50.3%)           | 0.234   |
| Dyslipidemia                | 116 (56.9%)    | 18 (66.7%)               | 98 (55.4%)           | 0.214   |
| Hypertension                | 172 (84.3%)    | 24 (88.9%)               | 148 (83.6%)          | 0.673   |
| Hemodialysis                | 9 (4.4%)       | 2 (7.4%)                 | 7 (4.0%)             | 0.229   |
| Current Smoker              | 39 (19.1%)     | 5 (18.5%)                | 34 (19.2%)           | 0.905   |
| LVEF (%)                    | 52.1±9.9       | 44.9±11.5                | 53.2±9.3             | 0.0002  |
| Time since CABG<br>(months) | 25.3±51.2      | 55.8±66.7                | 20.7±47.0            | 0.0008  |
| Prior MI                    | 34 (16.7%)     | 8 (29.6%)                | 26 (14.7%)           | 0.08    |
| Post PCI                    | 23 (11.3%)     | 5 (18.5%)                | 18 (10.2%)           | 0.319   |
| Prior HF                    | 17 (8.3%)      | 3 (11.1%)                | 14 (7.9%)            | 0.539   |

|              |             |            |             |       |
|--------------|-------------|------------|-------------|-------|
| Using ITA    | 191 (93.6%) | 23 (85.2%) | 168 (94.9%) | 0.089 |
| EuroSCORE II | 1.90±1.32   | 2.43±1.69  | 1.81±1.24   | 0.038 |

LVEF: left ventricular ejection fraction by ultrasonic cardiography, CABG: coronary aorta bypass graft, MI: myocardial infarction, PCI: percutaneous coronary intervention, HF: heart failure, ITA: internal thoracic artery

Table 2a. CTA, MPI Findings: Univariable and Multivariate Analysis for Cardiac Events

|         | Cardiac Events (n=27) | No Events (n=177) | Annual Event Rate, % | Unadjusted Hazards Ratio (95%CI) | P value | Adjusted Hazards Ratio (95%CI) | P value |
|---------|-----------------------|-------------------|----------------------|----------------------------------|---------|--------------------------------|---------|
| UCT=0   | 8 (6.5%)              | 115 (93.5%)       | 2.82                 | 1                                |         | 1                              |         |
| UCT ≥ 1 | 19 (23.5%)            | 62 (76.5%)        | 8.27                 | 3.07 (1.38-7.49)                 | 0.0054  | 2.34# (1.01-5.89)              | 0.0465  |
| SSS < 4 | 4 (3.8%)              | 101 (96.2%)       | 1.44                 | 1                                |         | 1                              |         |
| SSS ≥ 4 | 23 (23.2%)            | 76 (76.8%)        | 9.67                 | 6.73 (2.59-22.96)                | <0.0001 | 3.36& (1.18-12.12)             | 0.0217  |

UCT: unprotected coronary territory, SSS: summed stress score, # Hazards ratio was adjusted for LVEF, time since CABG, EuroSCORE II, and SSS, & Hazards ratio was adjusted for LVEF, time since CABG, EuroSCORE II, and UCT. Eight events in patients with UCT=0 included 3 nonfatal MI and 5 HF, 19 events in



UCT $\geq$ 1 included 3 cardiac death, 6 nonfatal MI, 3 late revascularization, and 7 heart failure. Four events in patients with SSS<4 included 3 nonfatal MI and 1 late revascularization, 23 events in SSS $\geq$ 4 included 3 cardiac death, 6 nonfatal MI, 2 late revascularization, and 12 heart failure.

Table 2b. Combination of UCT and SSS: (Univariable and Multivariate Analysis for Cardiac Events)

| Group | UCT      | SSS      | No of patients | No of patients with Cardiac Events (%) | Annual Event Rate (%) | Unadjusted hazards ratio (95%CI) | P value | Adjusted hazards ratio\$ (95%CI) | P value |
|-------|----------|----------|----------------|----------------------------------------|-----------------------|----------------------------------|---------|----------------------------------|---------|
| A     | 0        | <4       | 75             | 2(2.7)                                 | 1.1                   | 1                                |         | 1                                |         |
| B     | $\geq$ 1 | <4       | 30             | 2(6.7)                                 | 2.0                   | 1.93<br>(0.23-16.16)             | 0.515   | 1.76<br>(0.21-15.11)             | 0.579   |
| C     | 0        | $\geq$ 4 | 48             | 6(13.0)                                | 5.7                   | 5.15<br>(1.19-35.17)             | 0.0279  | 2.73<br>(0.55-19.93)             | 0.225   |
| D     | $\geq$ 1 | $\geq$ 4 | 51             | 17(33.0)                               | 12.9                  | 11.9<br>(3.40-75.19)             | <0.0001 | 6.84<br>(1.83-44.5)              | 0.0026  |

\$ Hazards ratio was adjusted for LVEF, time since CABG, and EuroSCORE II

Table 3. Discrimination of Each Predicting Models for Cardiac Events

| Risk Factors and Imaging Findings | Discrimination         |           |           |         |           |         |
|-----------------------------------|------------------------|-----------|-----------|---------|-----------|---------|
|                                   | C Index (95%CI)        | p Value   | NRI       | p Value | IDI       | p Value |
| Clinical risk factors#            | 0.768<br>(0.655-0.880) | Reference | Reference |         | Reference |         |
| Clinical risk factors# plus UCT   | 0.811<br>(0.718-0.905) | 0.1049    | 0.707     | 0.0003* | 0.0369    | 0.0235  |
| Clinical risk factors# plus SSS   | 0.807<br>(0.701-0.912) | 0.1156    | 0.731     | 0.0002* | 0.0421    | 0.0005  |

|                                            |                        |           |           |         |           |        |
|--------------------------------------------|------------------------|-----------|-----------|---------|-----------|--------|
| Clinical risk factors#<br>plus UCT and SSS | 0.834<br>(0.742-0.927) | 0.0454*   | 0.649     | 0.0008* | 0.0701    | 0.0006 |
| Clinical risk factors# plus UCT            |                        | Reference | Reference |         | Reference |        |
| Clinical risk factors#<br>plus UCT and SSS |                        | 0.1989    | 0.707     | 0.0003* | 0.0281    | 0.039  |
| Clinical risk factors# plus SSS            |                        | Reference | Reference |         | Reference |        |
| Clinical risk factors#<br>plus UCT and SSS |                        | 0.1486    | 0.645     | 0.0009* | 0.0333    | 0.0009 |

UCT: unprotected coronary territory, SSS: summed stress score, NRI: Net Reclassification Improvement, IDI:

Integrated Discrimination Improvement

#Clinical risk factors comprise LVEF, time since CABG, and EuroSCORE II

1  
2  
3  
4  
5  
6  
7  
8  
9  
10  
11  
12  
13  
14  
15  
16  
17  
18  
19  
20  
21  
22  
23  
24  
25  
26  
27  
28  
29  
30  
31  
32  
33  
34  
35  
36  
37  
38  
39  
40  
41  
42  
43  
44  
45  
46  
47  
48  
49  
50  
51  
52  
53  
54  
55  
56  
57  
58  
59  
60

For peer review only

1  
2  
3  
4  
5  
6  
7  
8  
9  
10  
11  
12  
13  
14  
15  
16  
17  
18  
19  
20  
21  
22  
23  
24  
25  
26  
27  
28  
29  
30  
31  
32  
33  
34  
35  
36  
37  
38  
39  
40  
41  
42  
43  
44  
45  
46  
47  
48  
49  
50  
51  
52  
53  
54  
55  
56  
57  
58  
59  
60

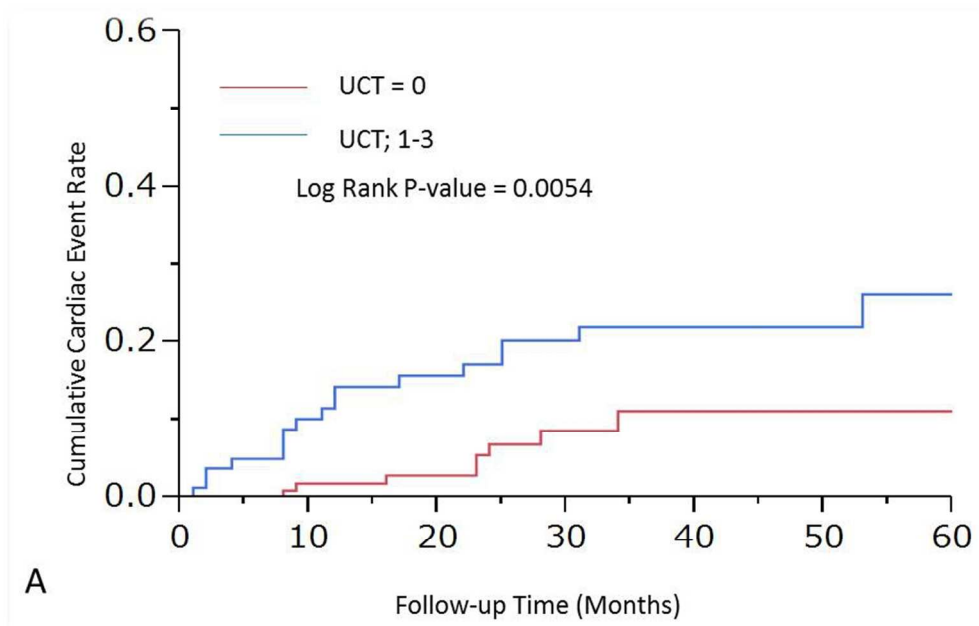

No. at Risk:

|          |     |     |    |    |    |    |   |
|----------|-----|-----|----|----|----|----|---|
| UCT = 0  | 123 | 107 | 82 | 47 | 28 | 15 | 5 |
| UCT; 1-3 | 81  | 65  | 58 | 47 | 35 | 20 | 7 |

254x190mm (96 x 96 DPI)

View only

1  
2  
3  
4  
5  
6  
7  
8  
9  
10  
11  
12  
13  
14  
15  
16  
17  
18  
19  
20  
21  
22  
23  
24  
25  
26  
27  
28  
29  
30  
31  
32  
33  
34  
35  
36  
37  
38  
39  
40  
41  
42  
43  
44  
45  
46  
47  
48  
49  
50  
51  
52  
53  
54  
55  
56  
57  
58  
59  
60

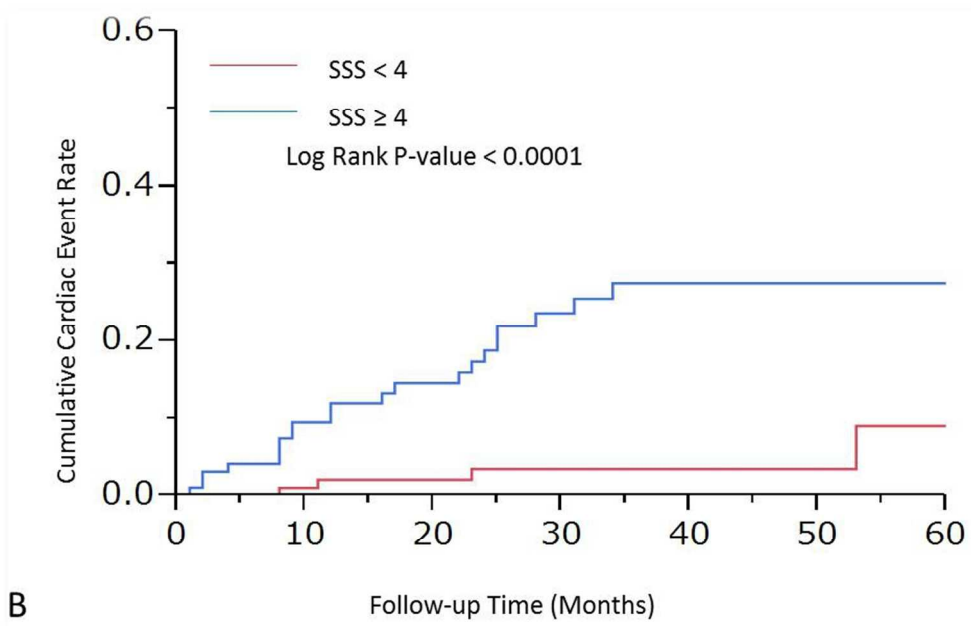

B

| No. at Risk: |     |    |    |    |    |    |   |
|--------------|-----|----|----|----|----|----|---|
| SSS < 4      | 105 | 94 | 77 | 52 | 32 | 20 | 5 |
| SSS ≥ 4      | 99  | 78 | 63 | 42 | 31 | 15 | 7 |

254x190mm (96 x 96 DPI)

ew only

1  
2  
3  
4  
5  
6  
7  
8  
9  
10  
11  
12  
13  
14  
15  
16  
17  
18  
19  
20  
21  
22  
23  
24  
25  
26  
27  
28  
29  
30  
31  
32  
33  
34  
35  
36  
37  
38  
39  
40  
41  
42  
43  
44  
45  
46  
47  
48  
49  
50  
51  
52  
53  
54  
55  
56  
57  
58  
59  
60

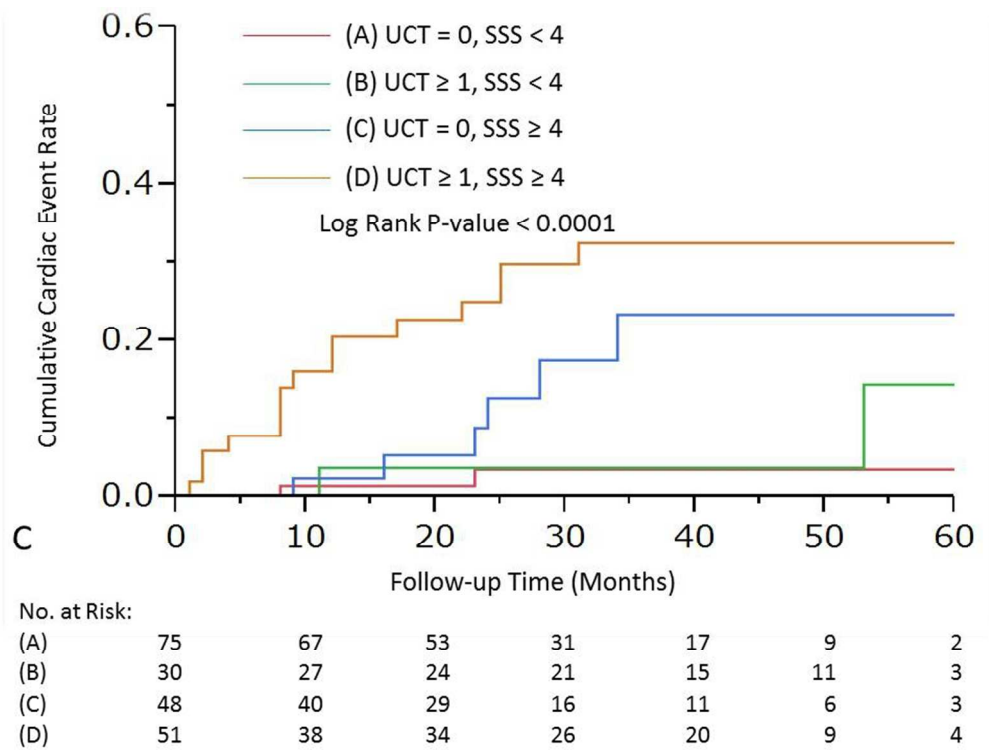

254x190mm (96 x 96 DPI)

ew only
